# Supplementary material for: Genetic analysis of the mouse brain proteome
Source: Springer Nature journal article supplement (doi:10.1038/ng861), 2002-03-25

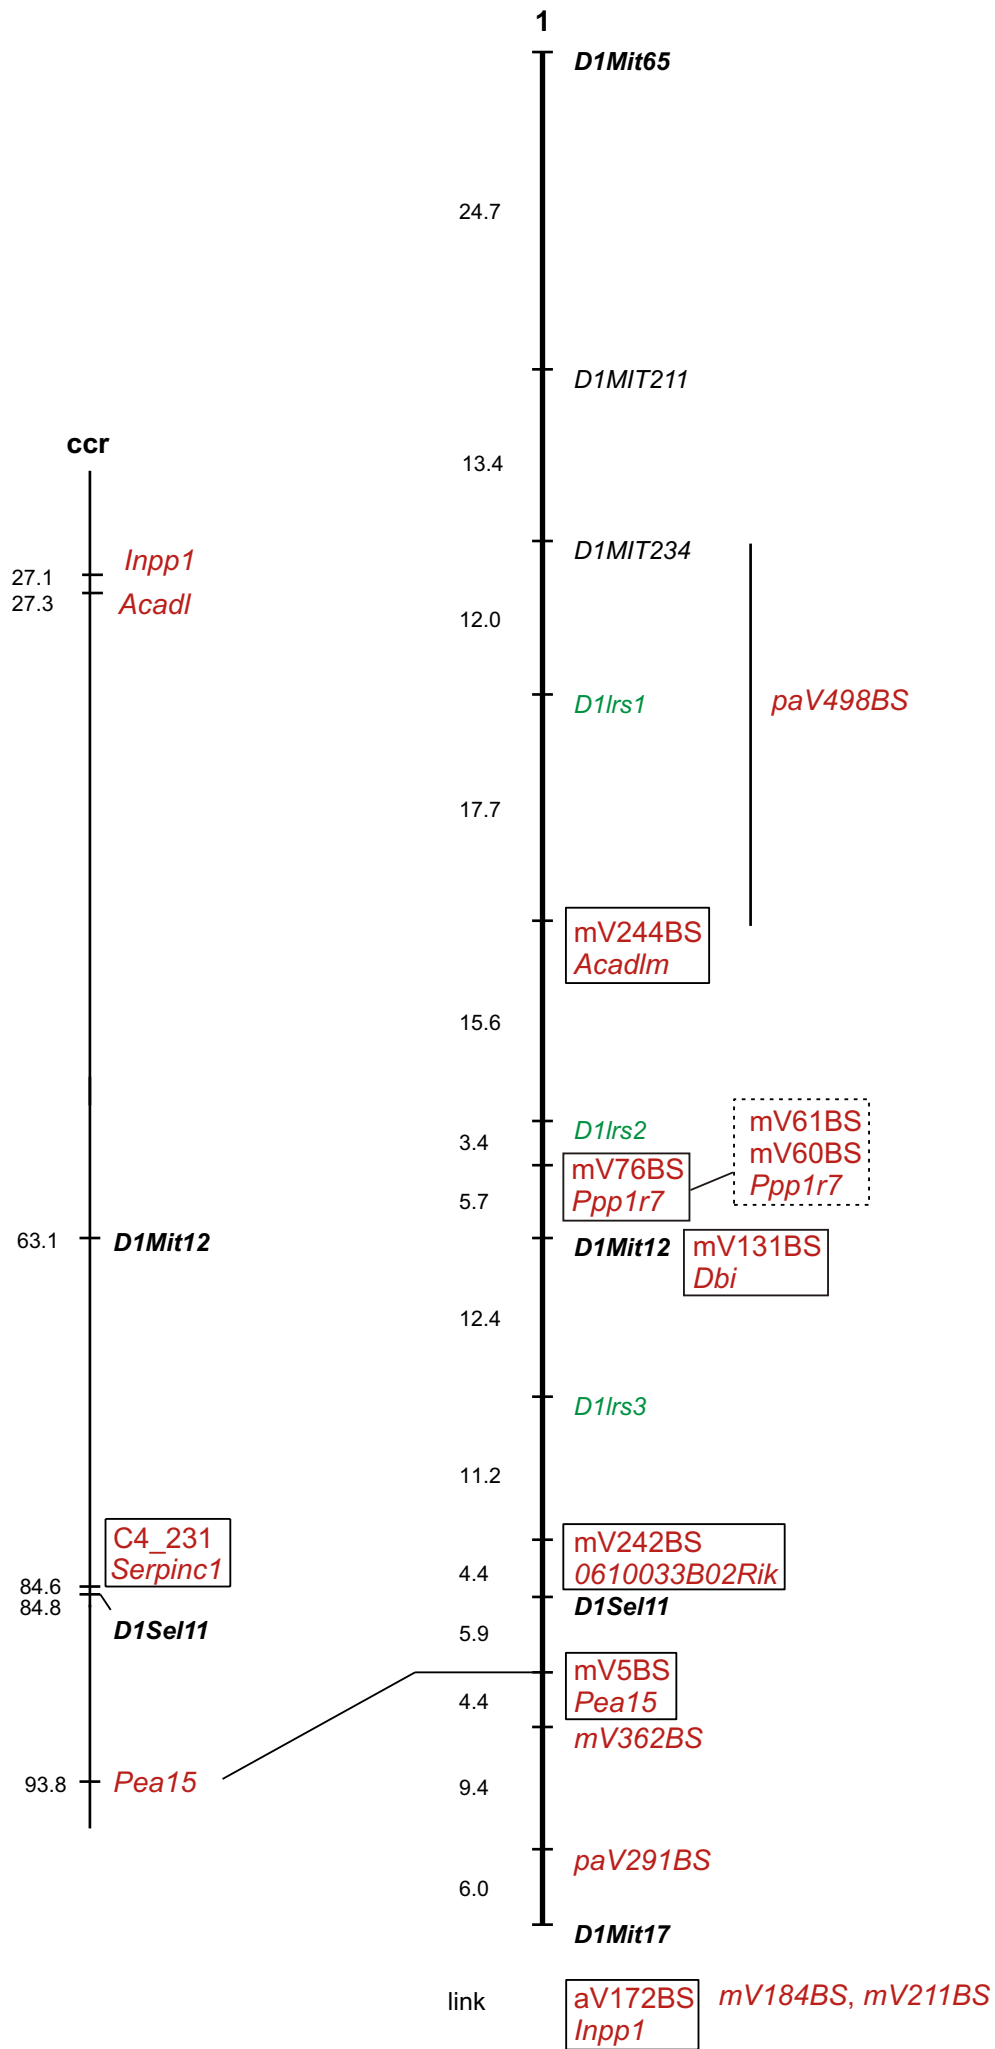

Fig. A Mouse chromosomes 1-19, X

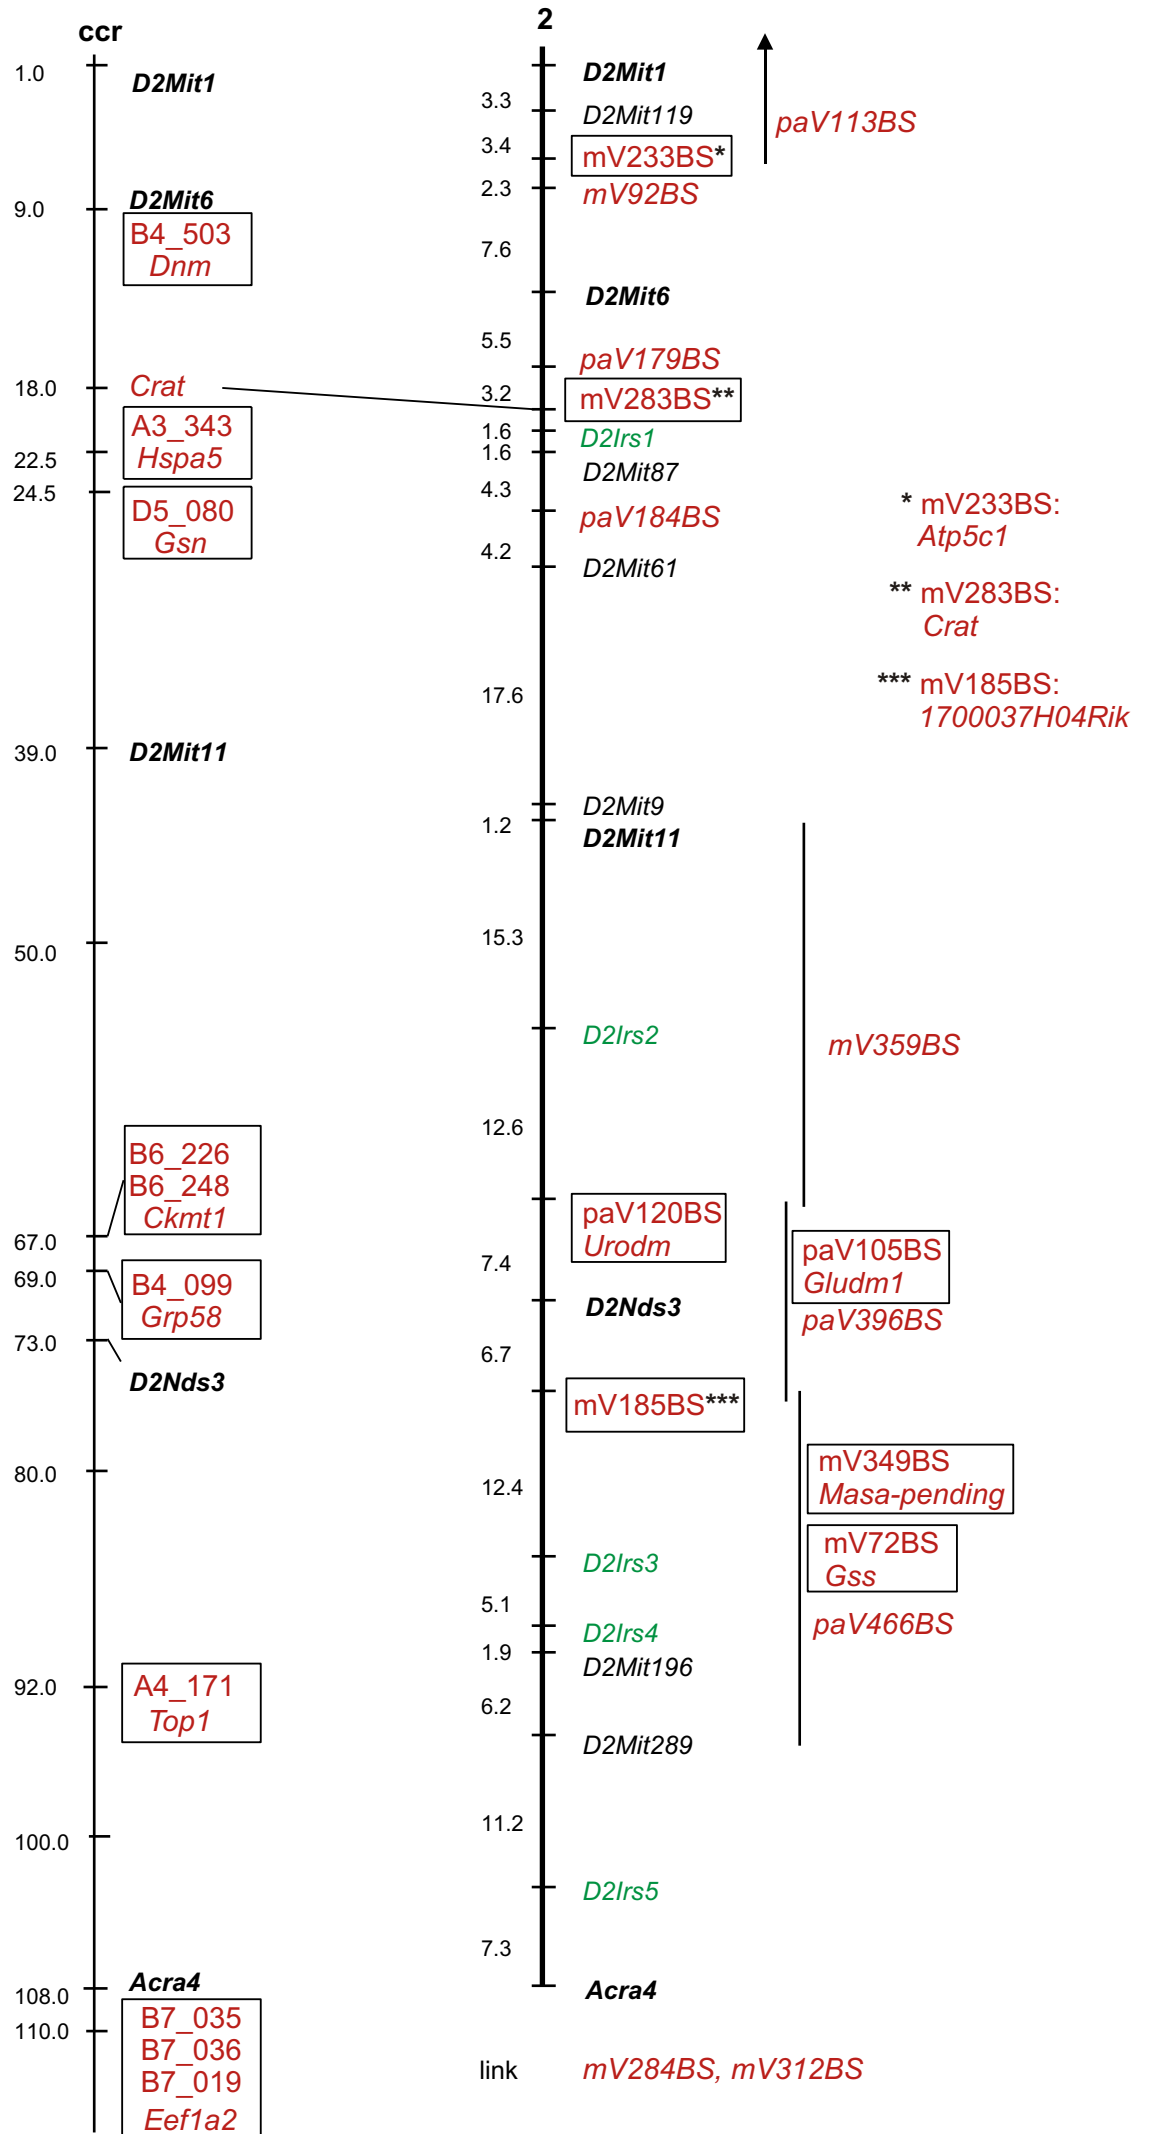

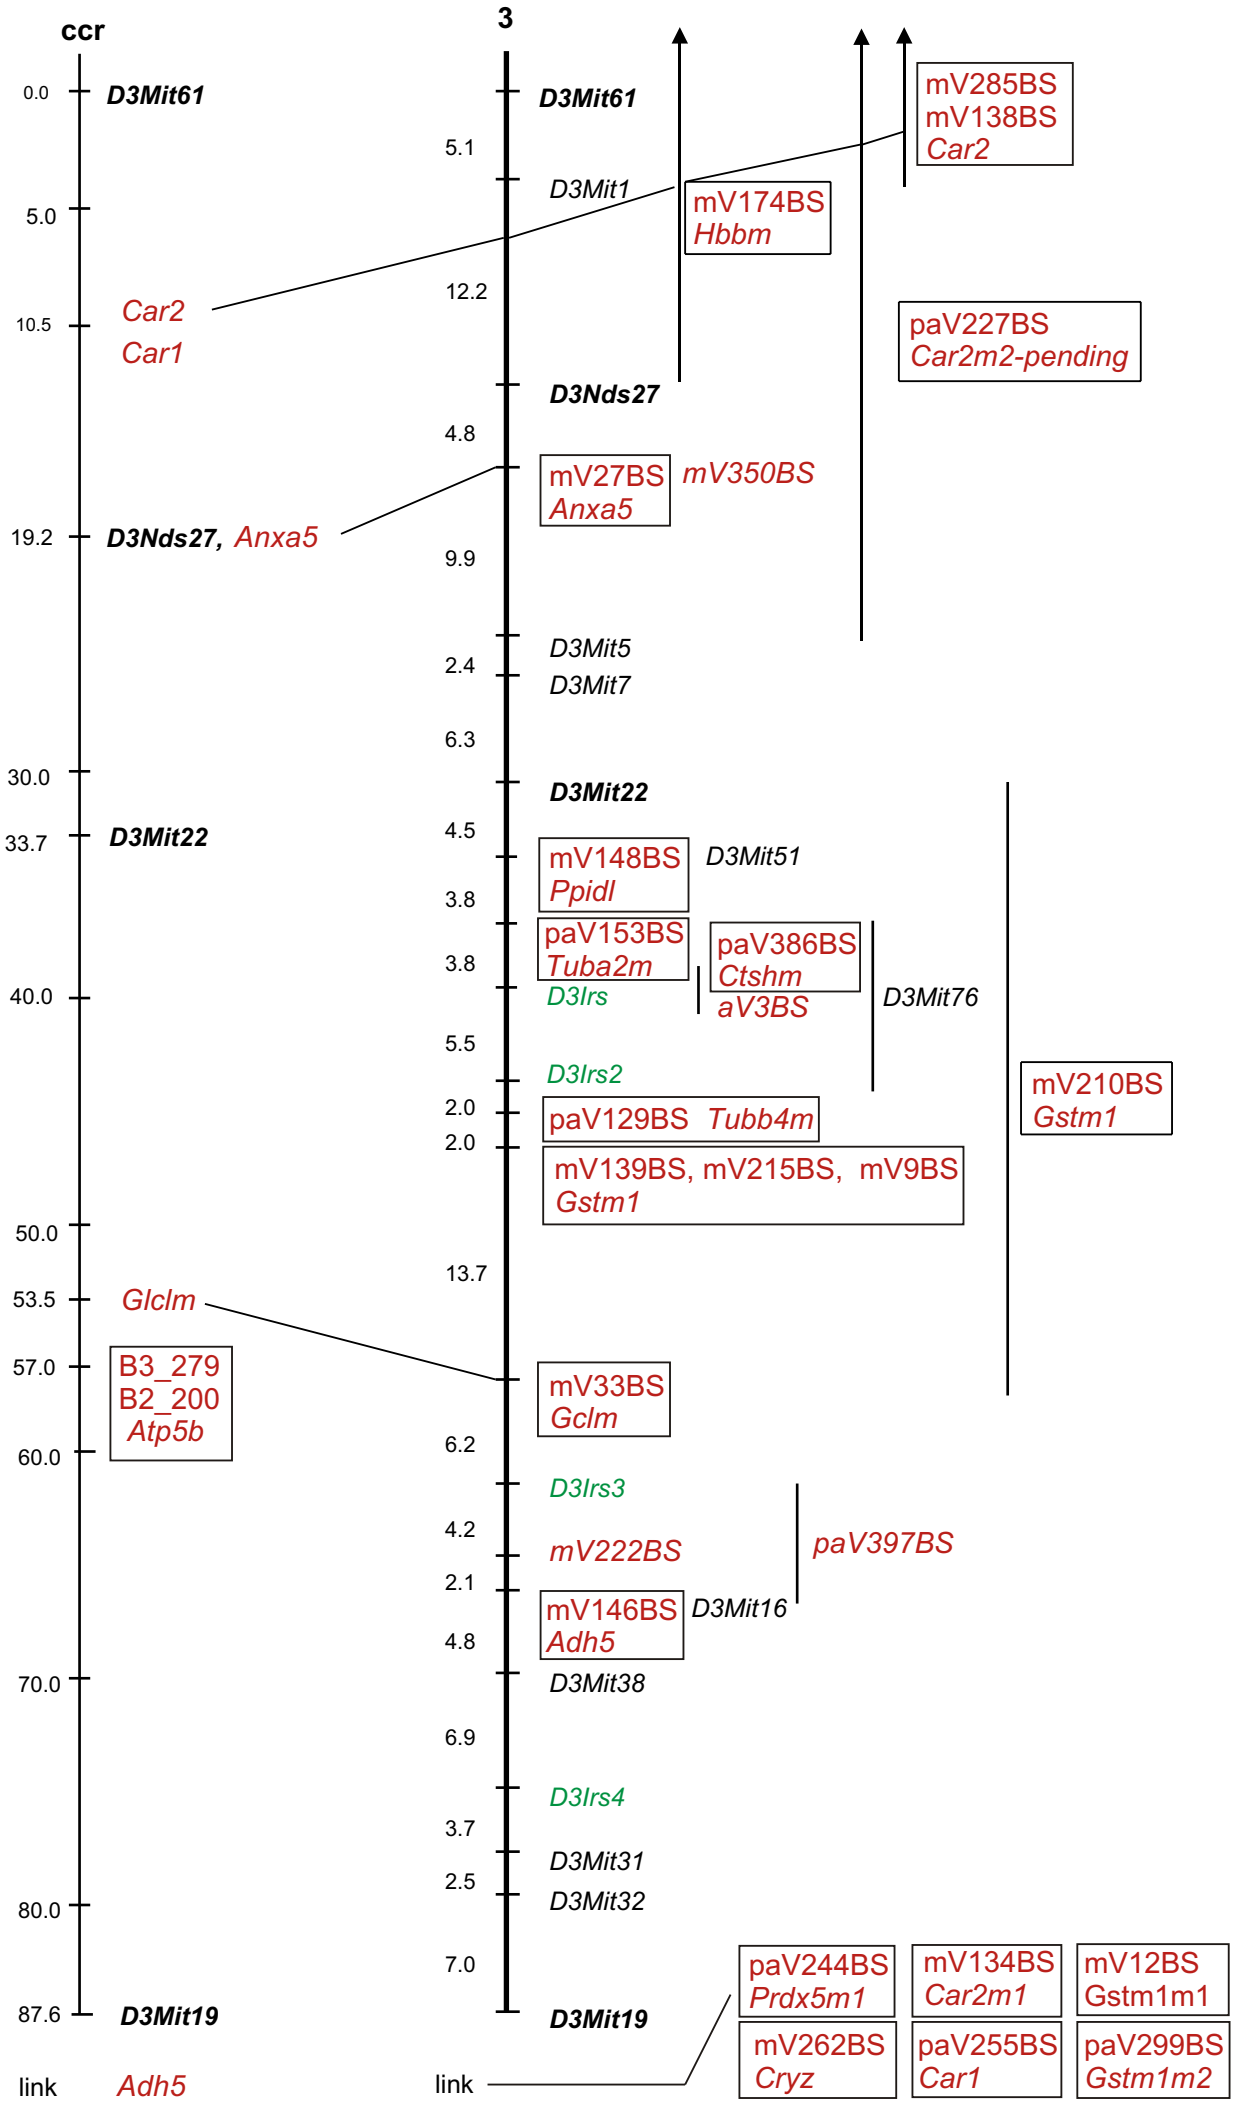

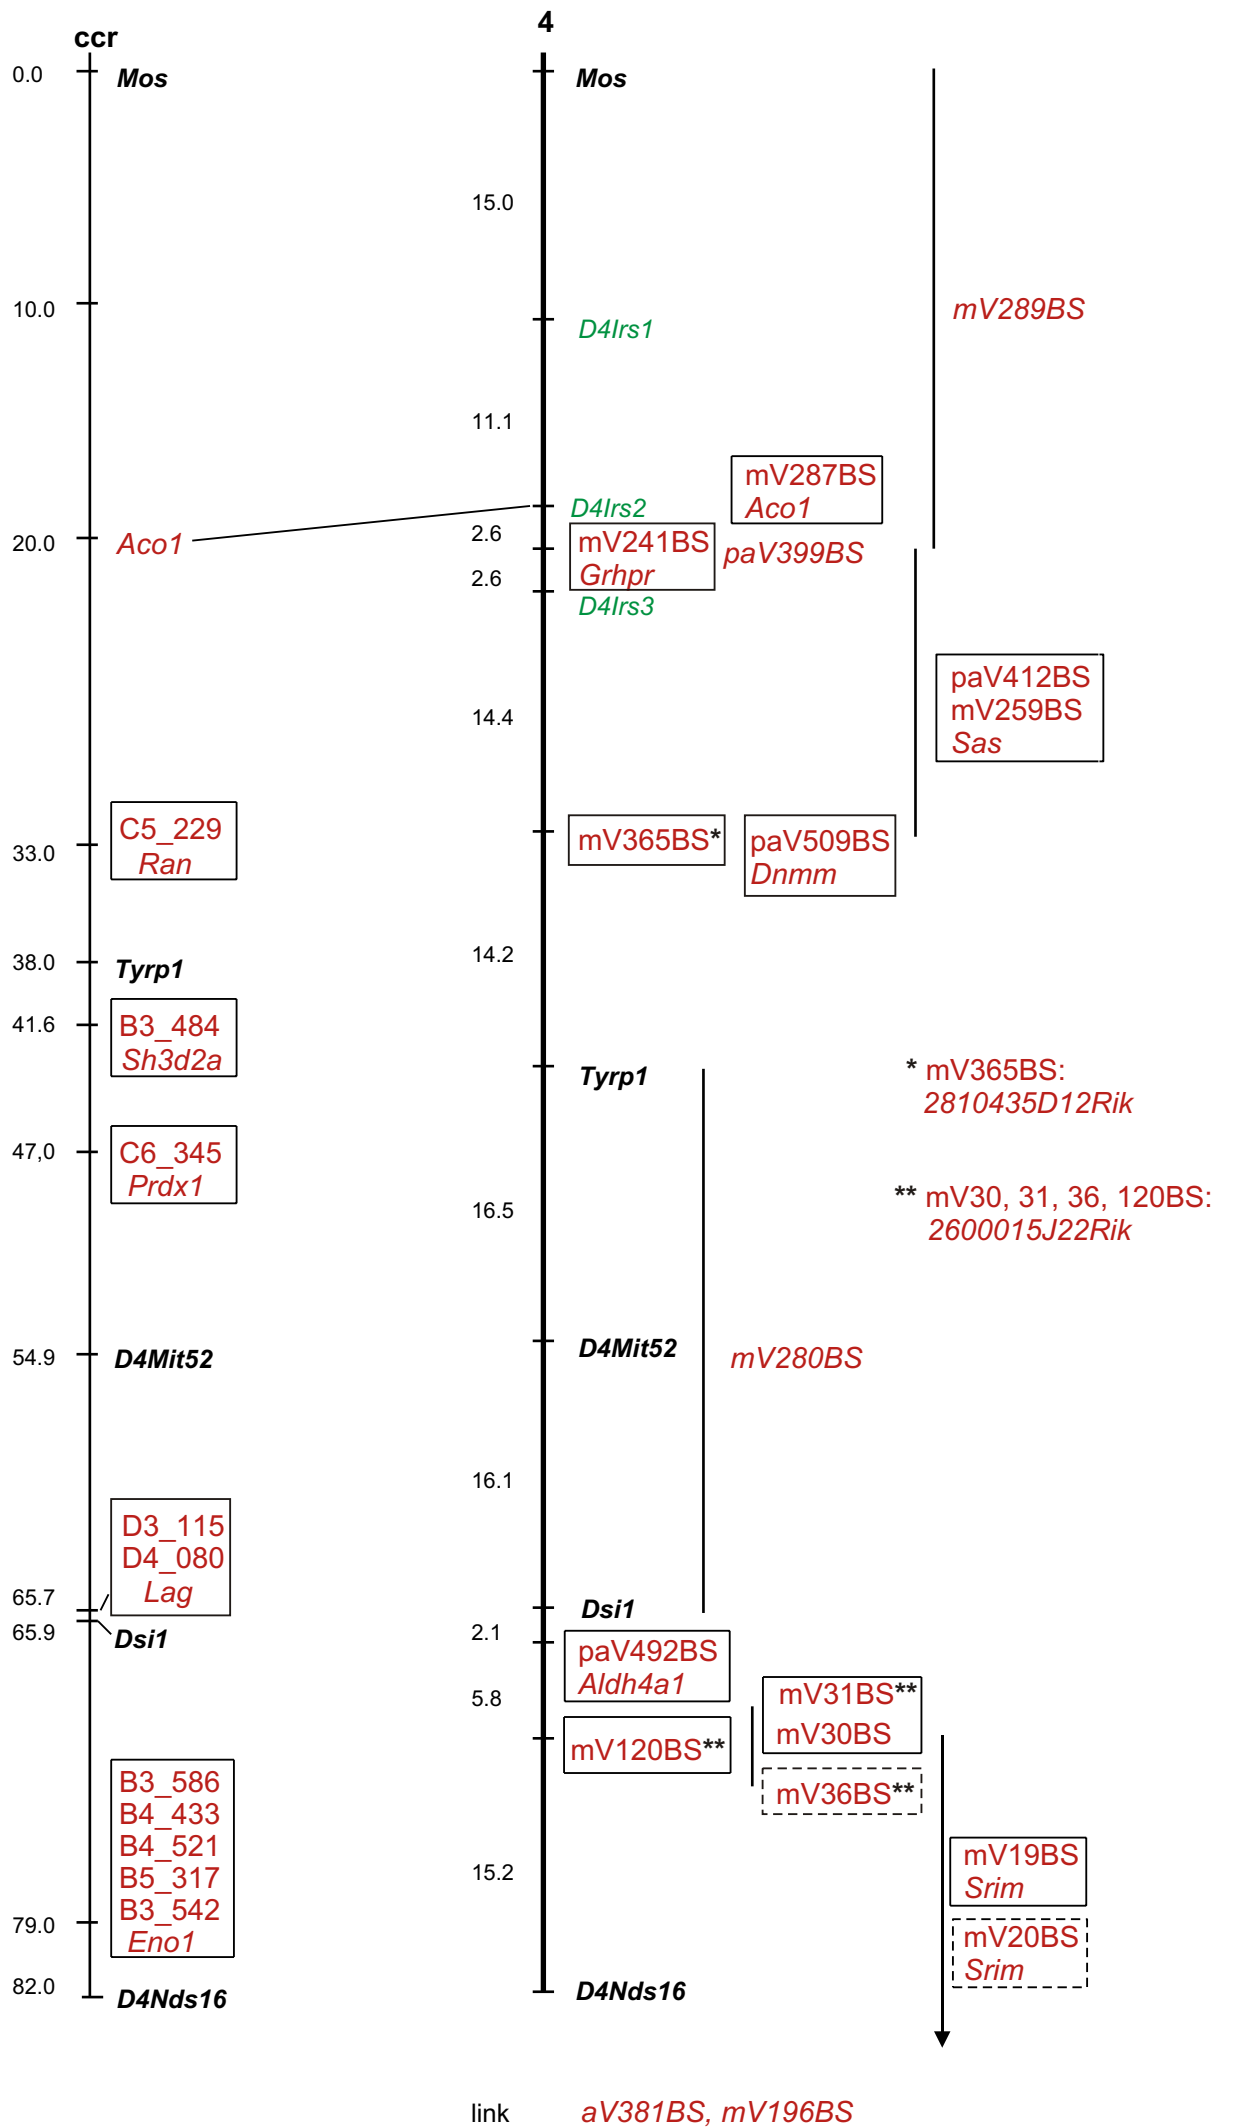

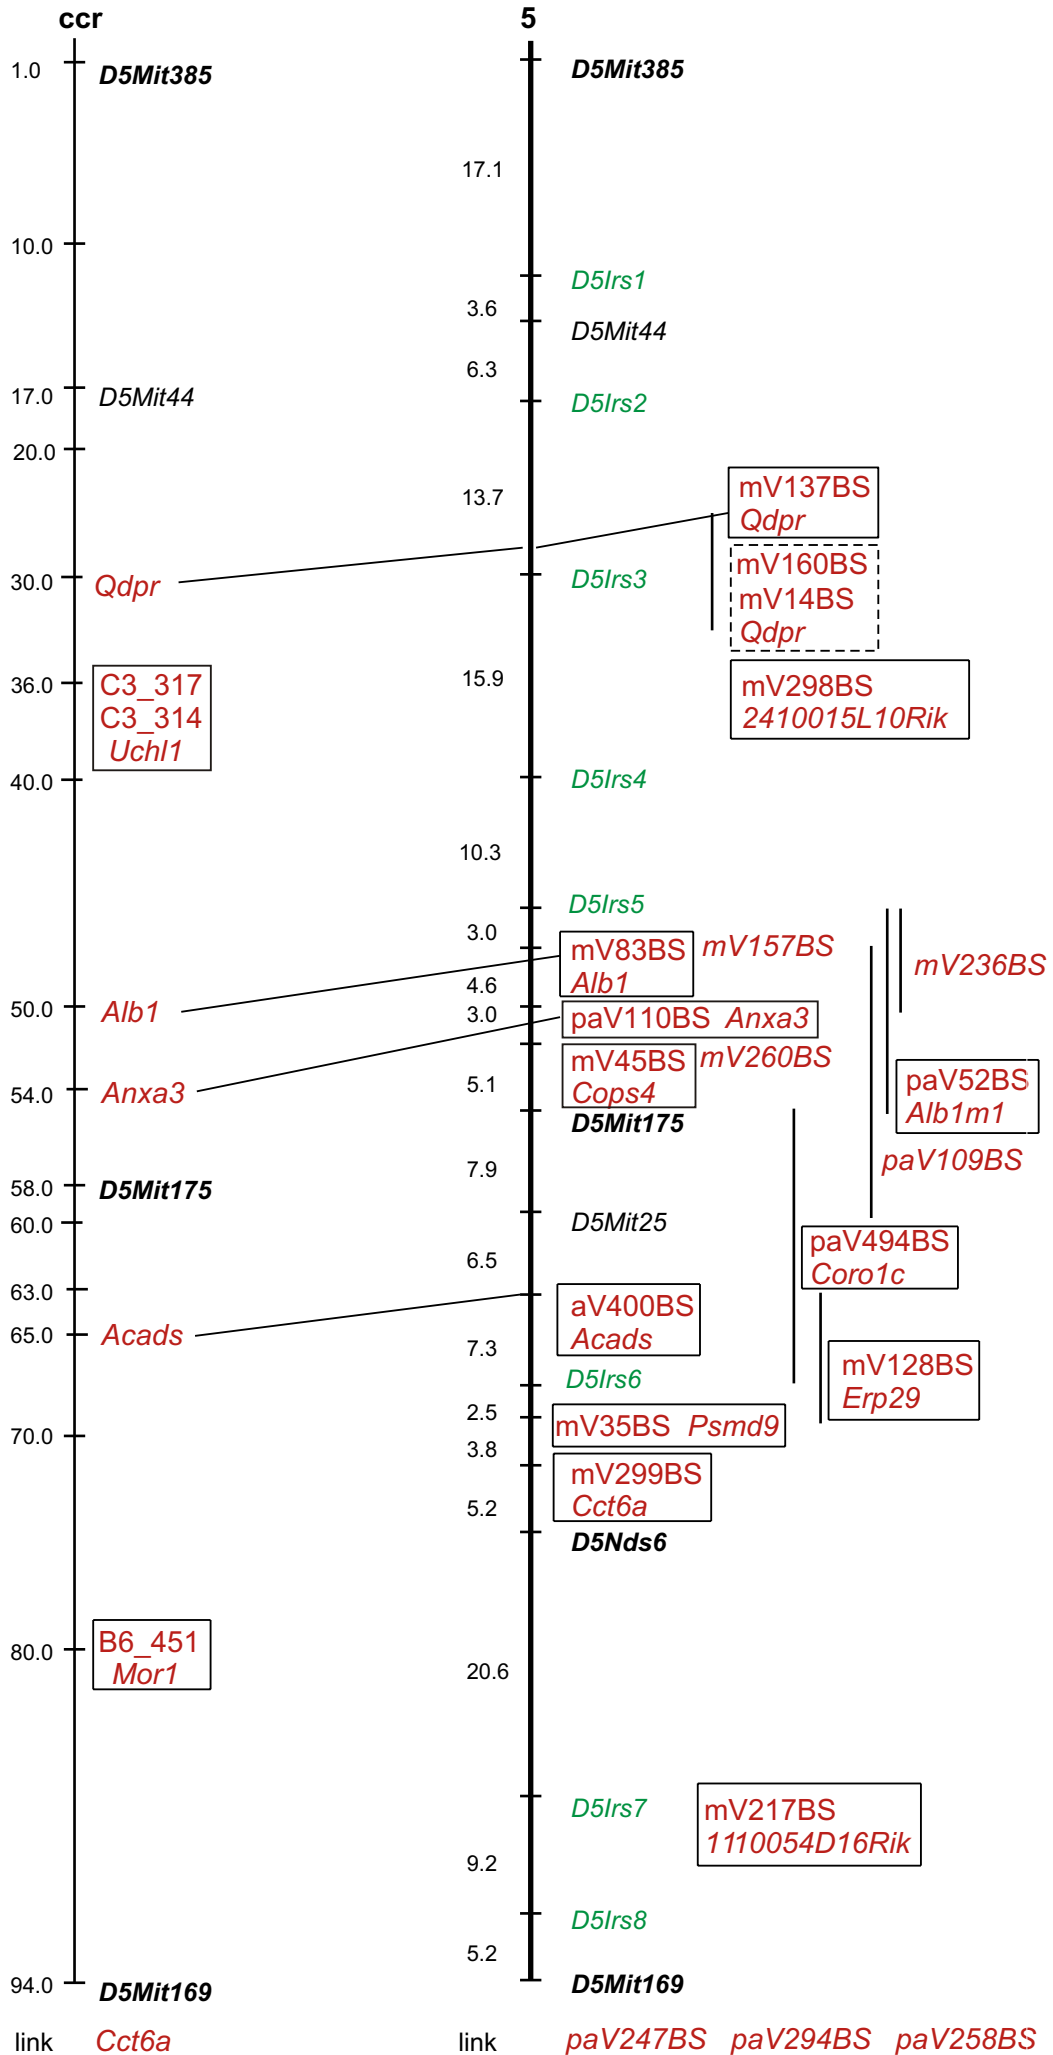

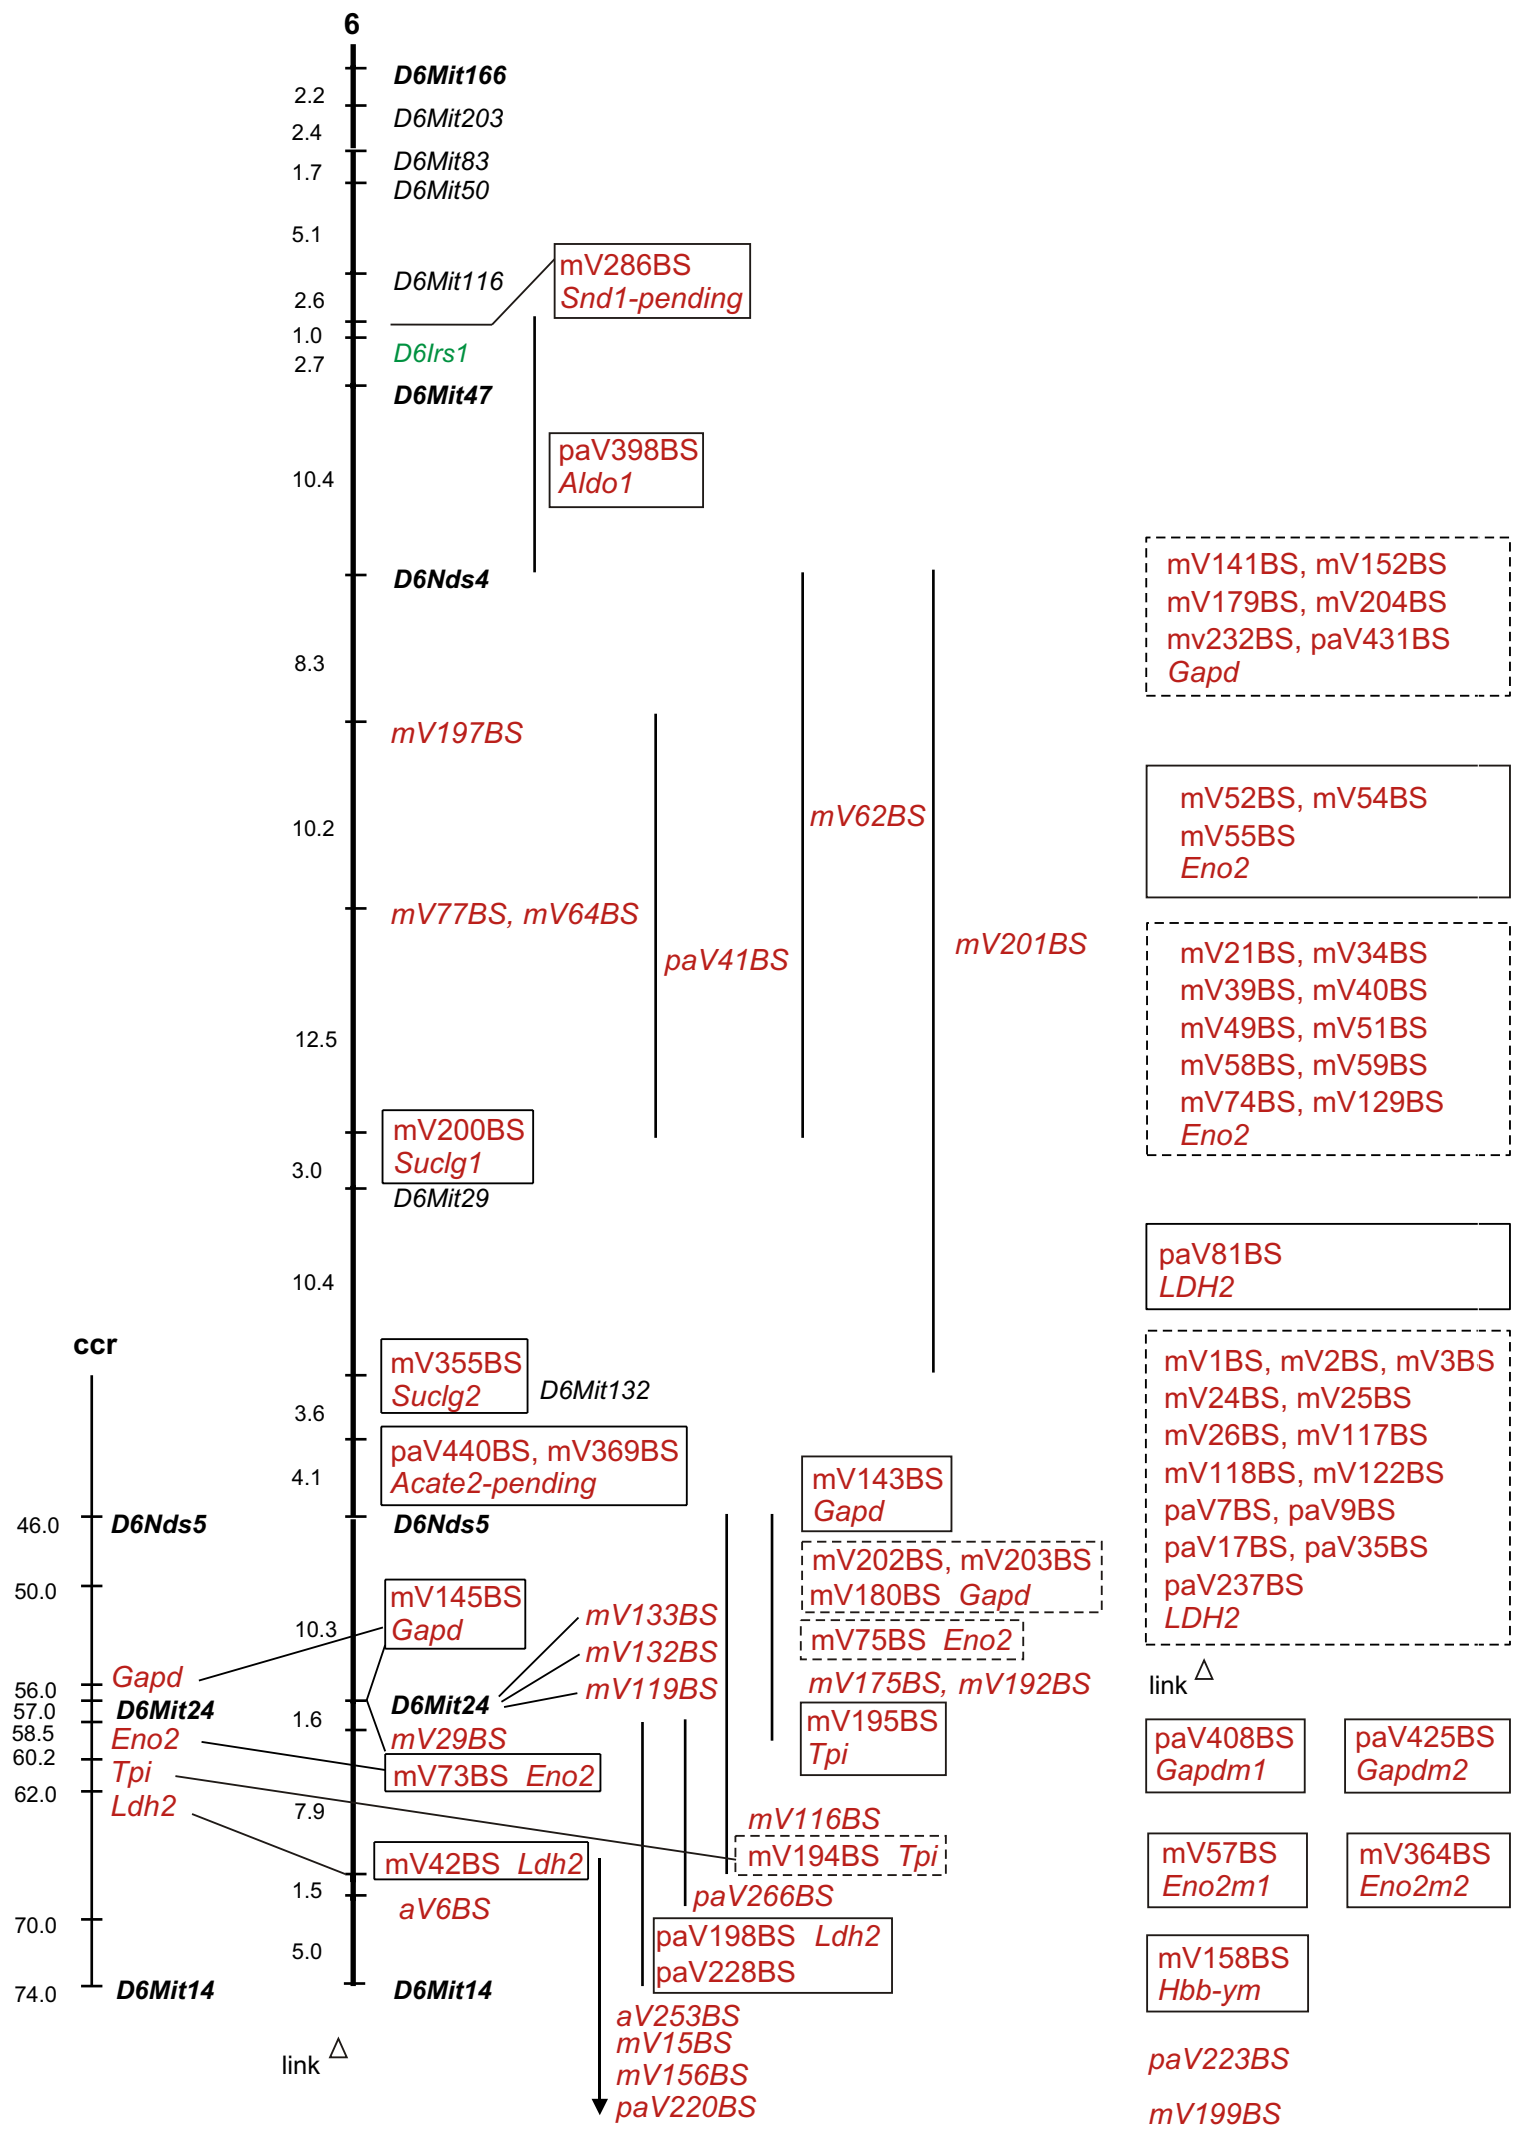

6

**D6Mit166**  
*D6Mit203*  
*D6Mit83*  
*D6Mit50*

5.1  
 2.6  
 1.0  
 2.7  
*D6Mit116* mV286BS  
Snd1-pending

*D6Mit47*  
 10.4  
paV398BS  
Aldo1

*D6Nds4*  
 8.3  
mV141BS, mV152BS  
mV179BS, mV204BS  
mV232BS, paV431BS  
Gapd

*mV197BS*  
 10.2  
*mV77BS, mV64BS*  
*paV41BS*  
*mV62BS*  
mV52BS, mV54BS  
mV55BS  
Eno2

12.5  
 3.0  
mV200BS  
Suclg1  
*D6Mit29*  
mV21BS, mV34BS  
mV39BS, mV40BS  
mV49BS, mV51BS  
mV58BS, mV59BS  
mV74BS, mV129BS  
Eno2

10.4  
paV81BS  
LDH2

**ccr**  
 3.6  
 4.1  
mV355BS  
Suclg2 *D6Mit132*  
paV440BS, mV369BS  
Acate2-pending  
mV143BS  
Gapd  
mV1BS, mV2BS, mV3BS  
mV24BS, mV25BS  
mV26BS, mV117BS  
mV118BS, mV122BS  
paV7BS, paV9BS  
paV17BS, paV35BS  
paV237BS  
LDH2

46.0  
 50.0  
**D6Nds5**  
 10.3  
mV145BS  
Gapd  
*mV133BS*  
*mV132BS*  
*mV119BS*  
mV202BS, mV203BS  
mV180BS Gapd  
mV75BS Eno2  
*mV175BS, mV192BS*  
mV195BS  
Tpi

56.0  
 57.0  
 58.5  
 60.2  
 62.0  
*Gapd*  
**D6Mit24**  
*Eno2*  
*Tpi*  
*Ldh2*  
 1.6  
mV29BS  
mV73BS Eno2  
mV42BS Ldh2  
*aV6BS*  
mV116BS  
mV194BS Tpi  
paV408BS  
Gapdm1  
paV425BS  
Gapdm2  
mV57BS  
Eno2m1  
mV364BS  
Eno2m2

70.0  
 74.0  
**D6Mit14**  
 5.0  
paV198BS Ldh2  
paV228BS  
aV253BS  
mV15BS  
mV156BS  
paV220BS  
mV158BS  
Hbb-ym  
*paV223BS*  
*mV199BS*

link Δ

link Δ

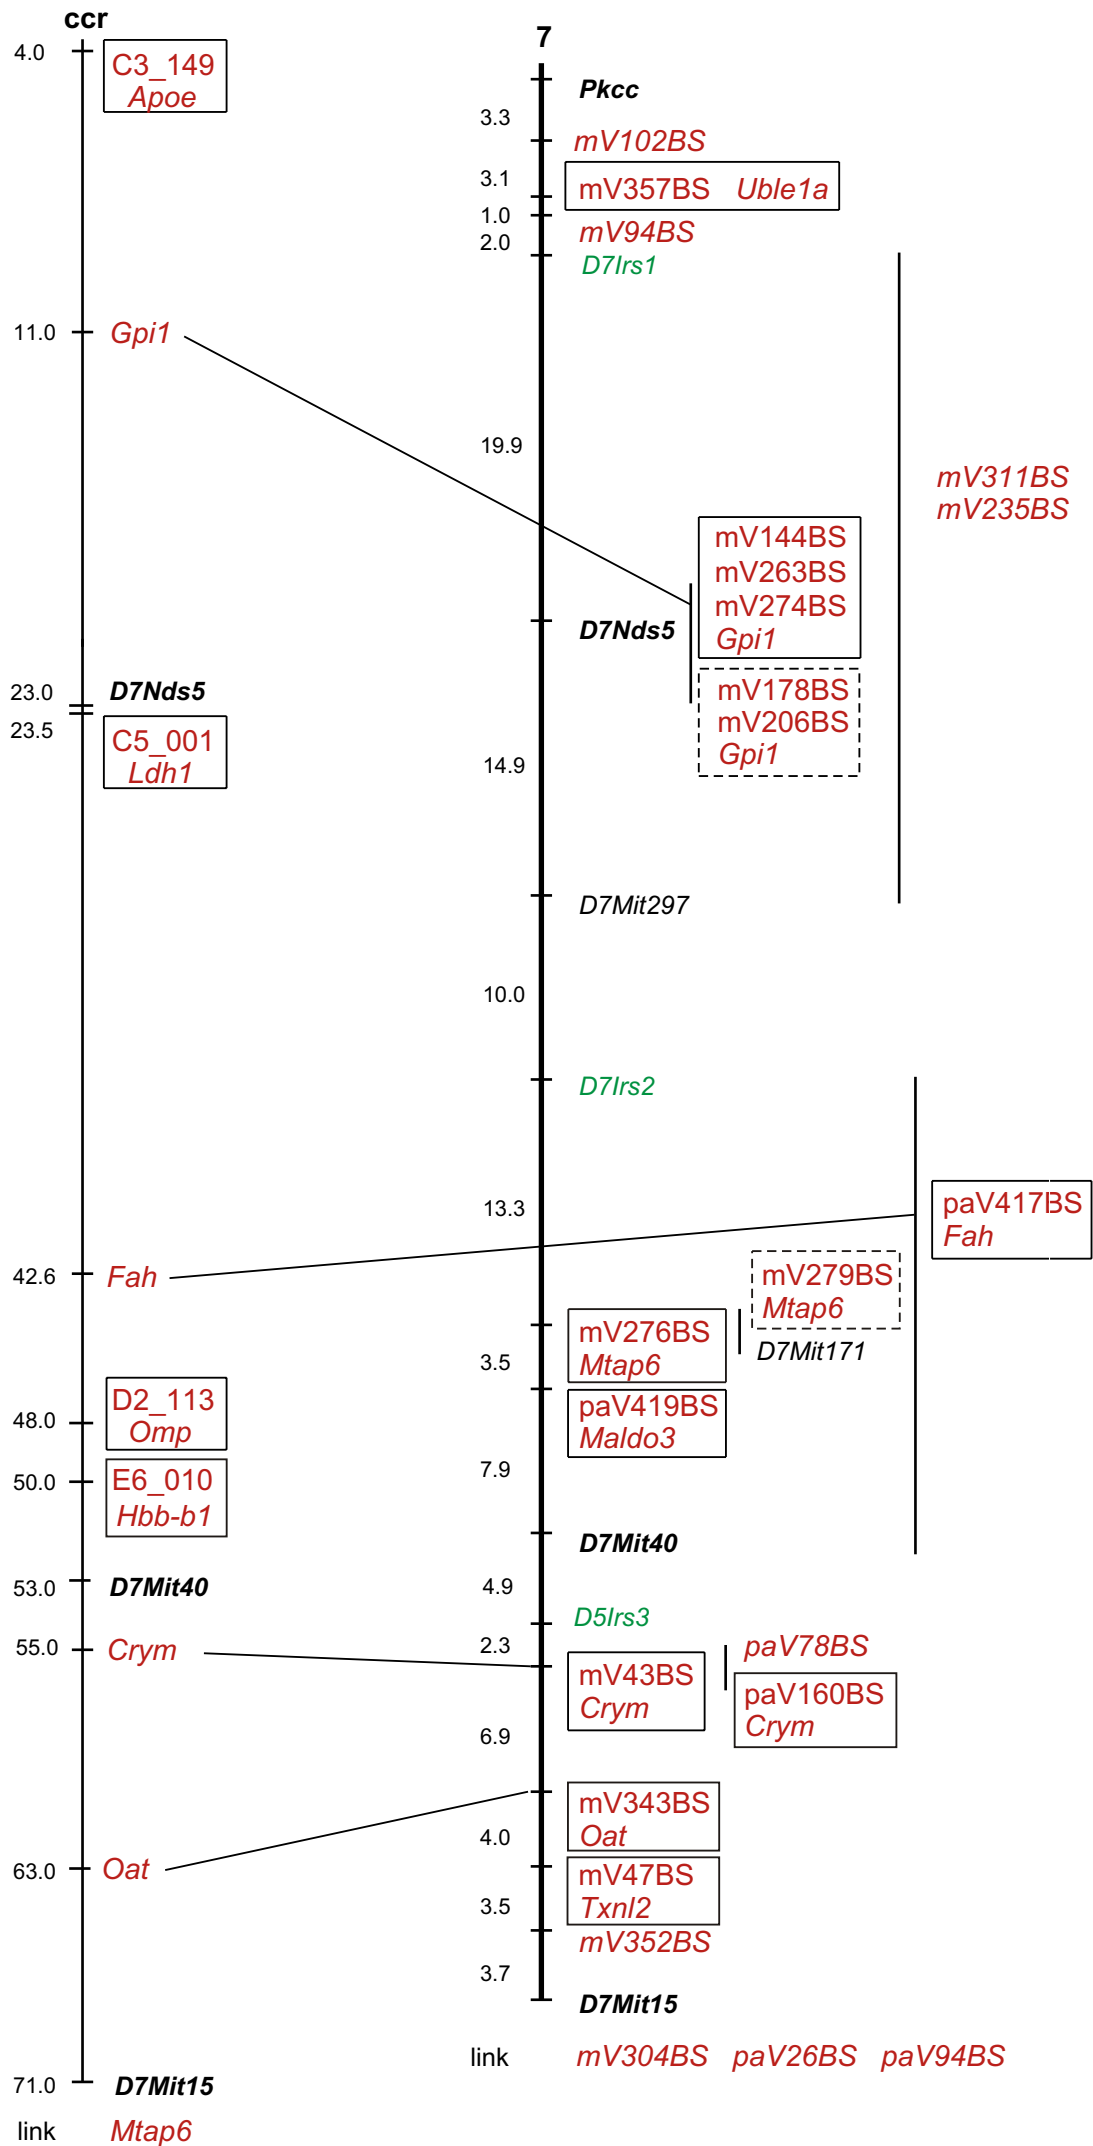

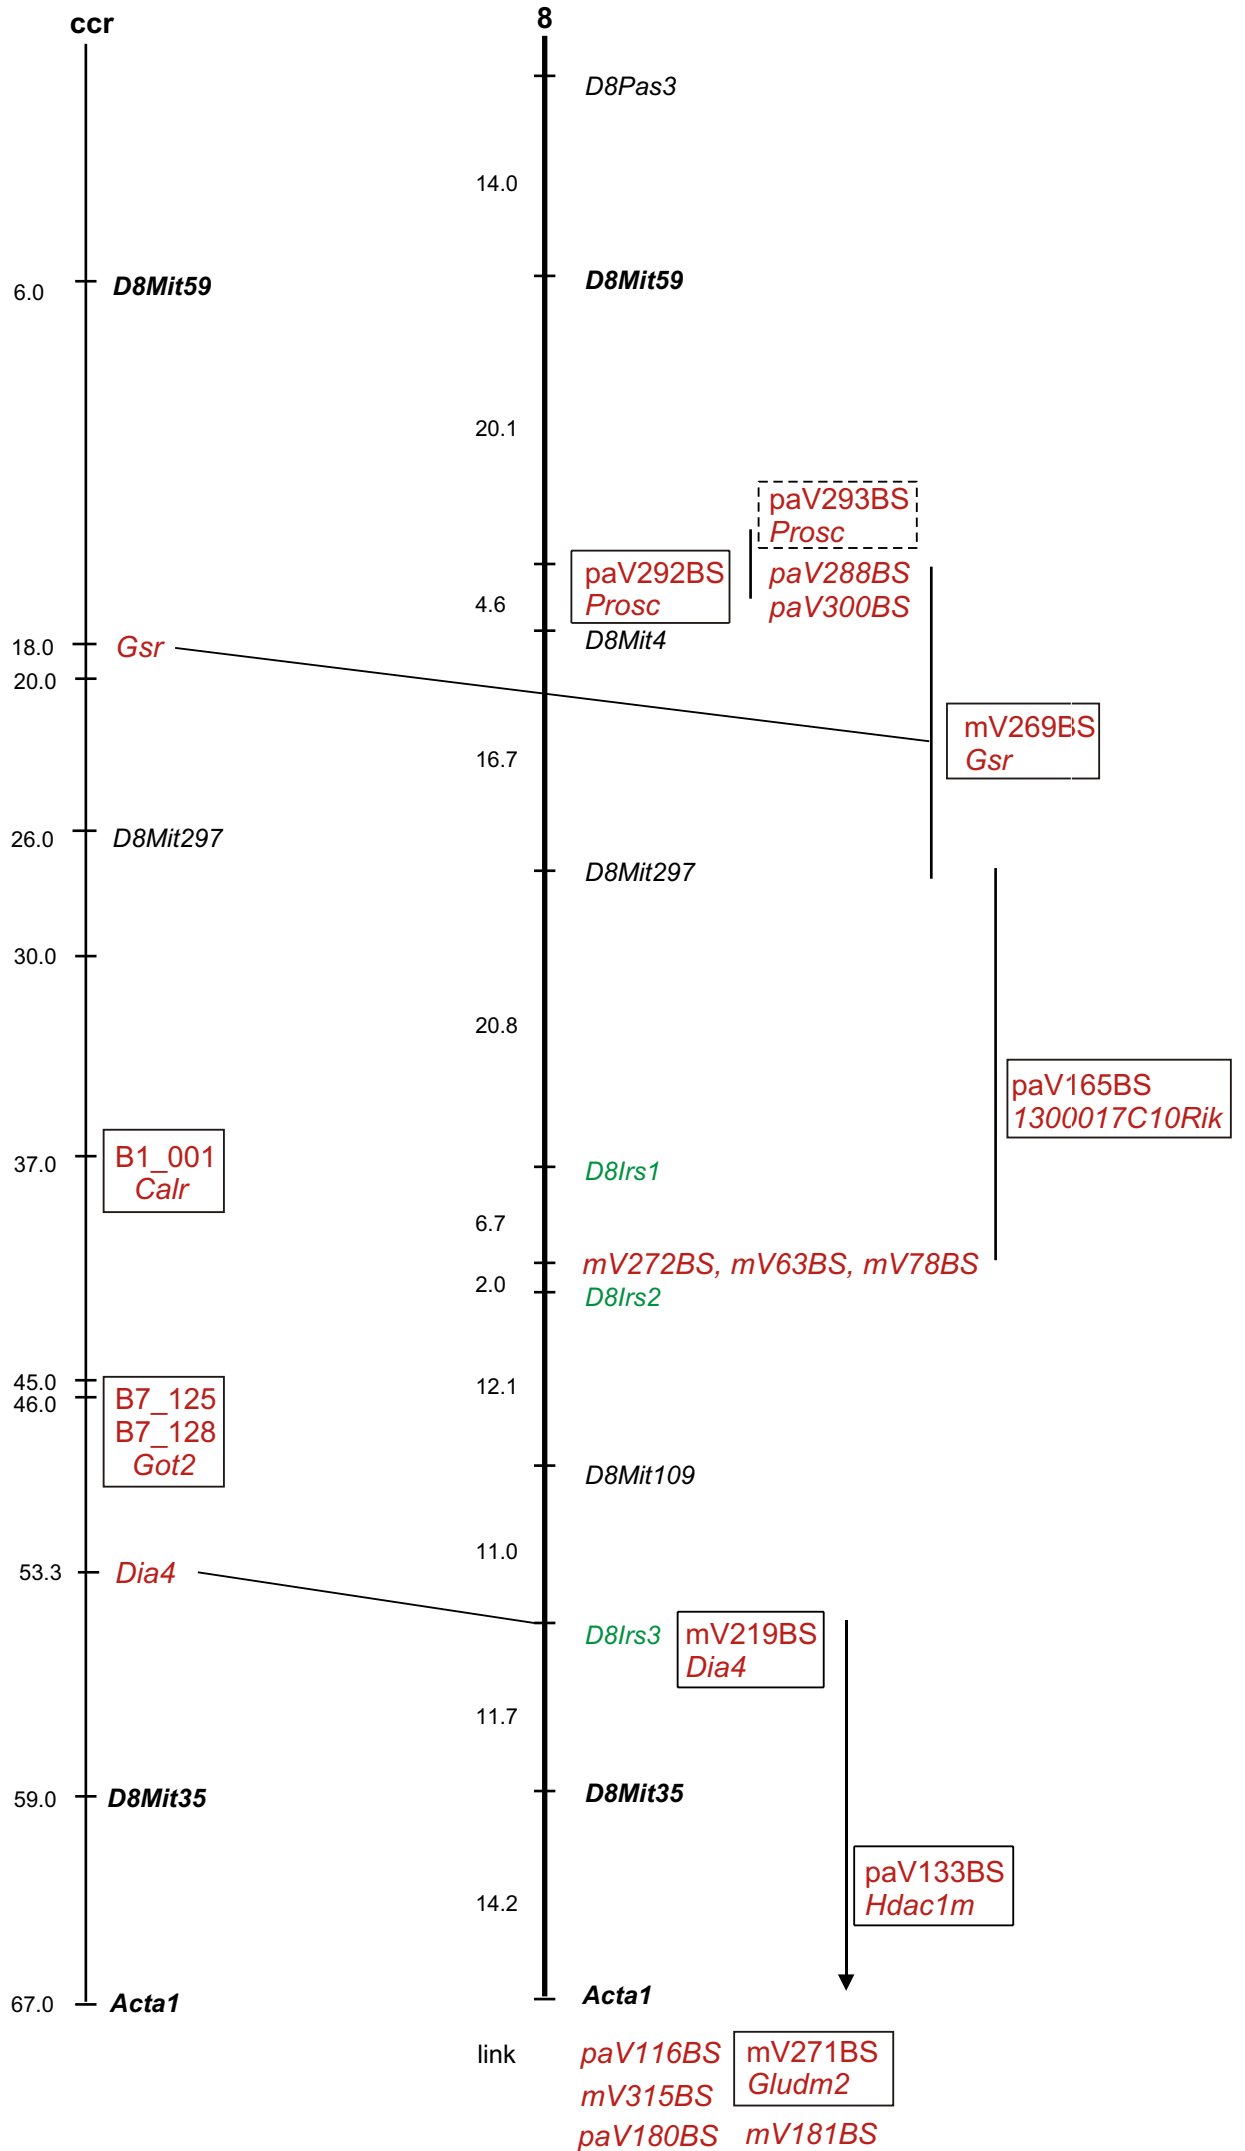

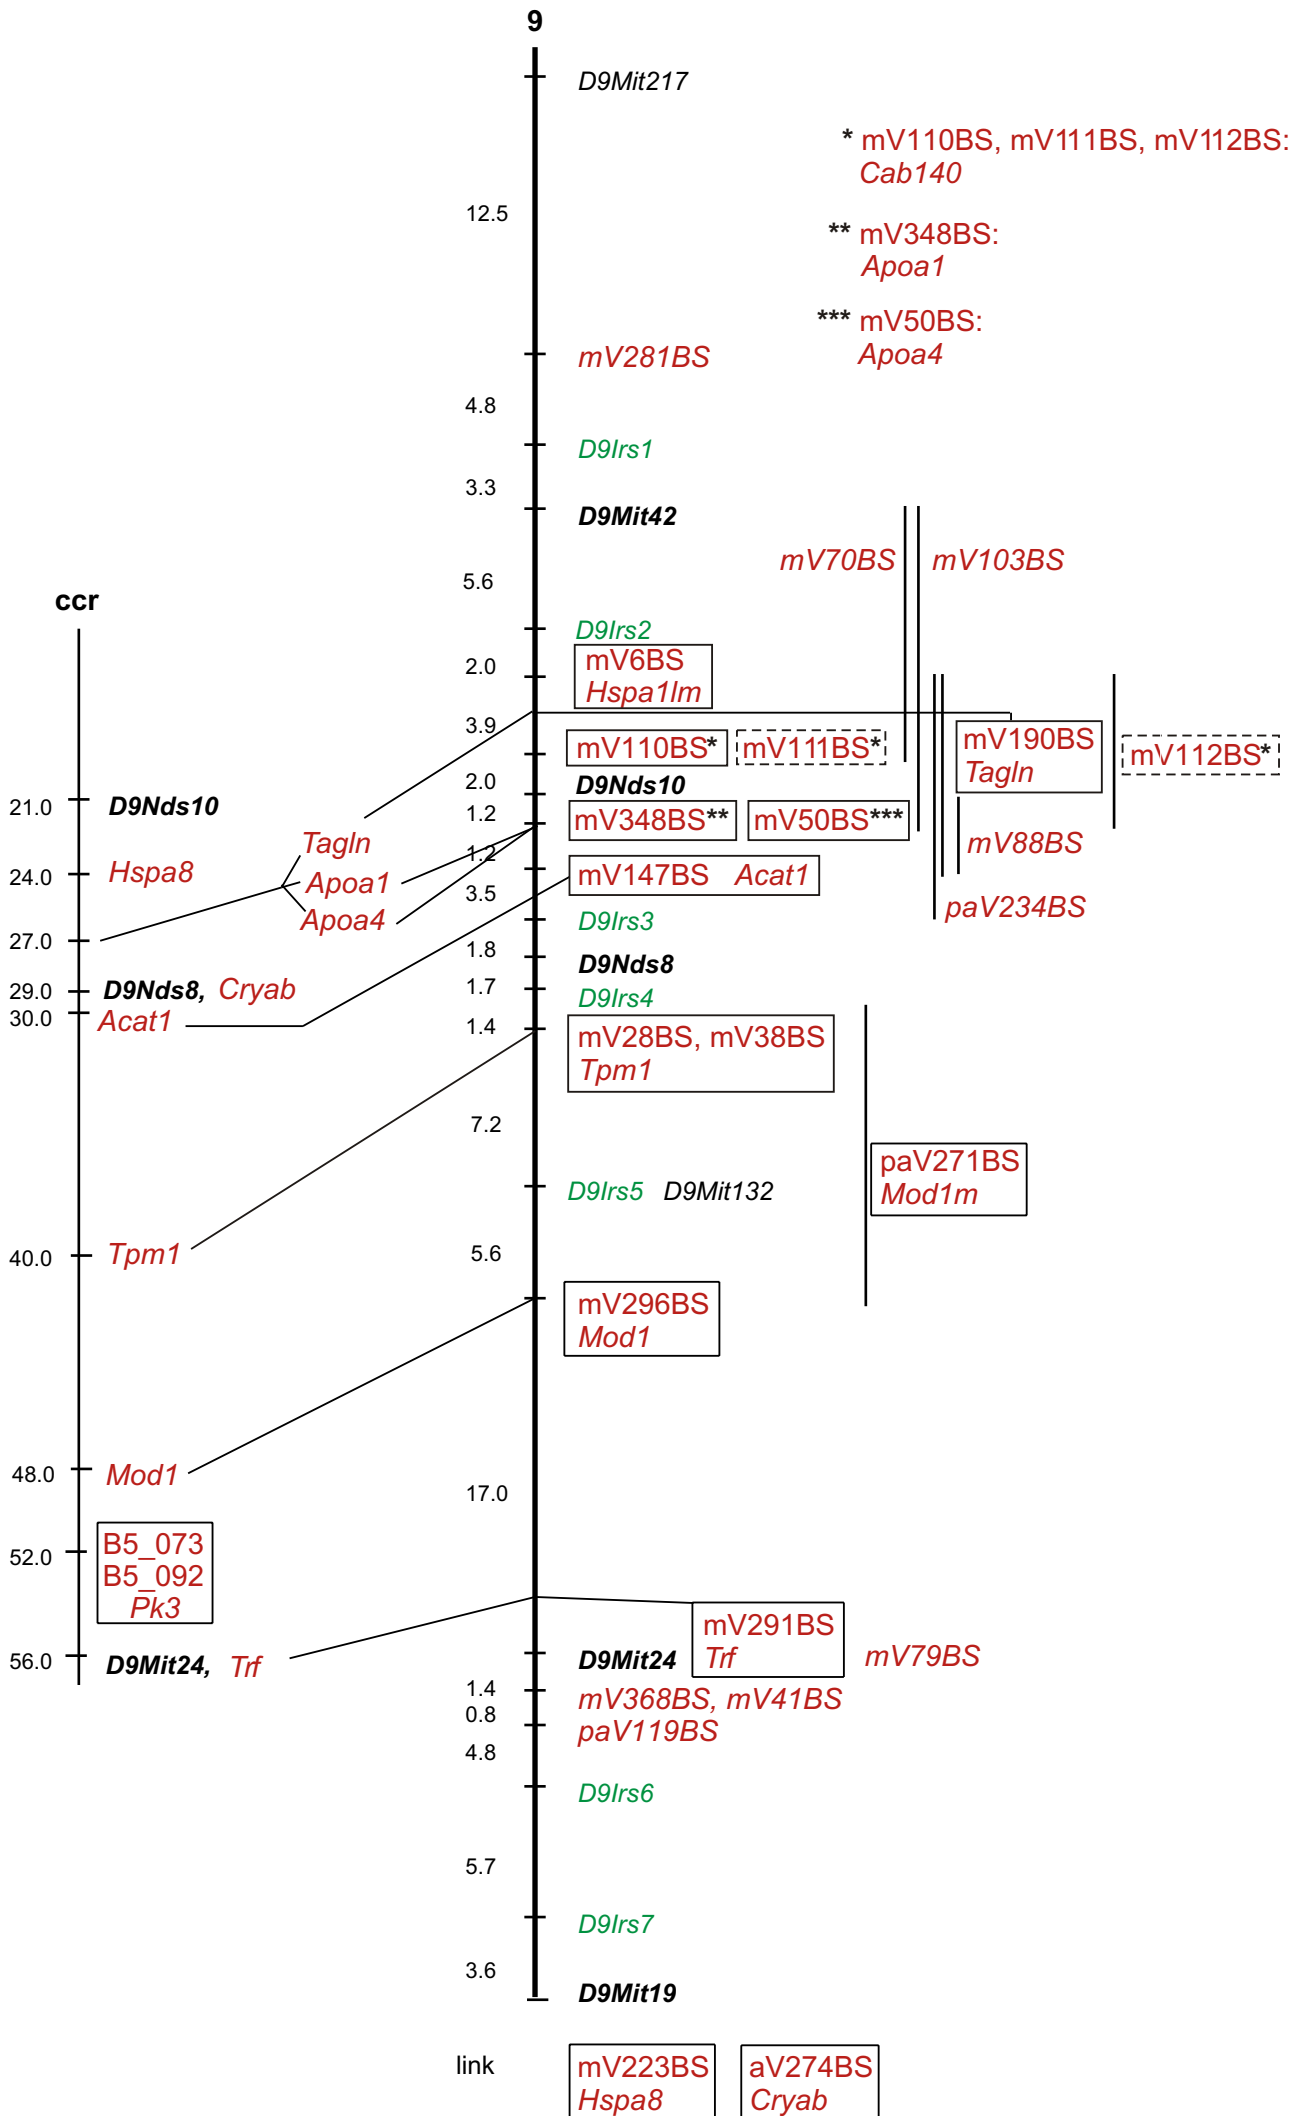

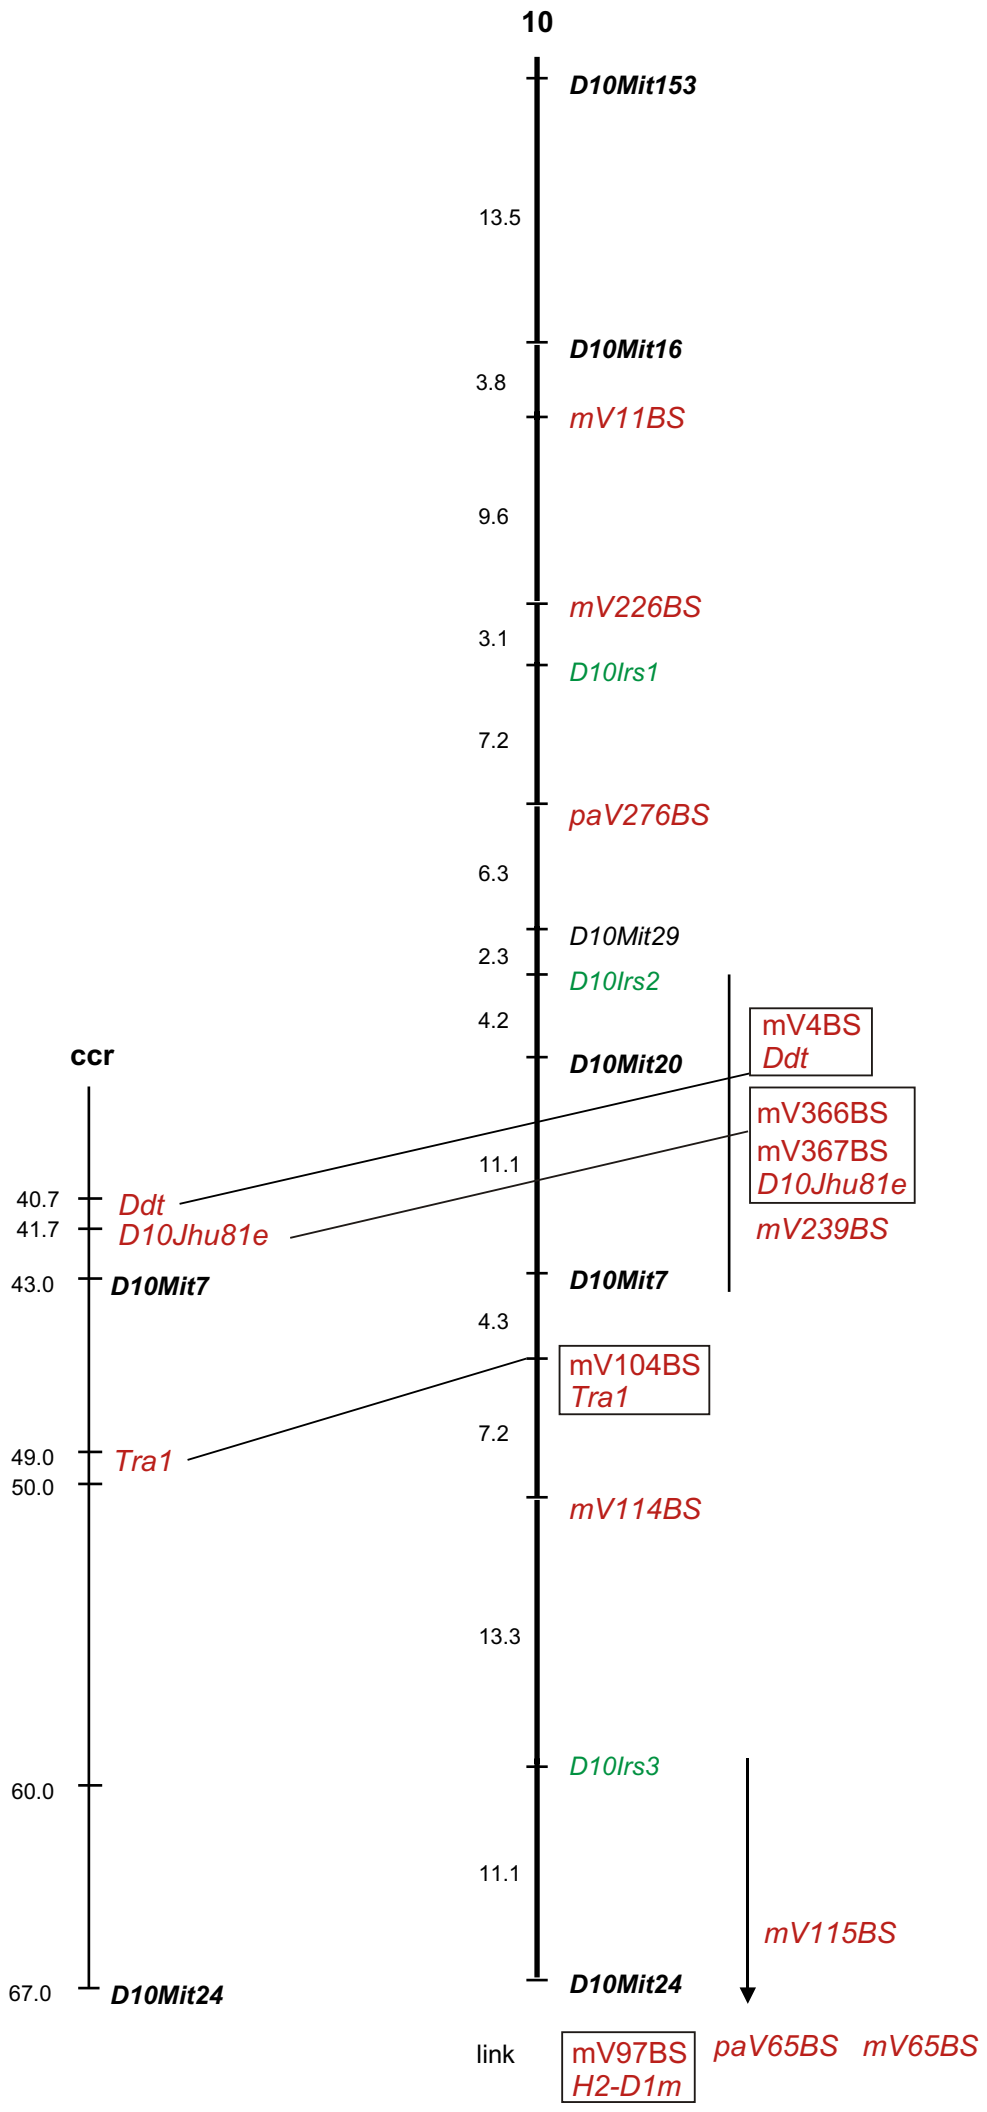

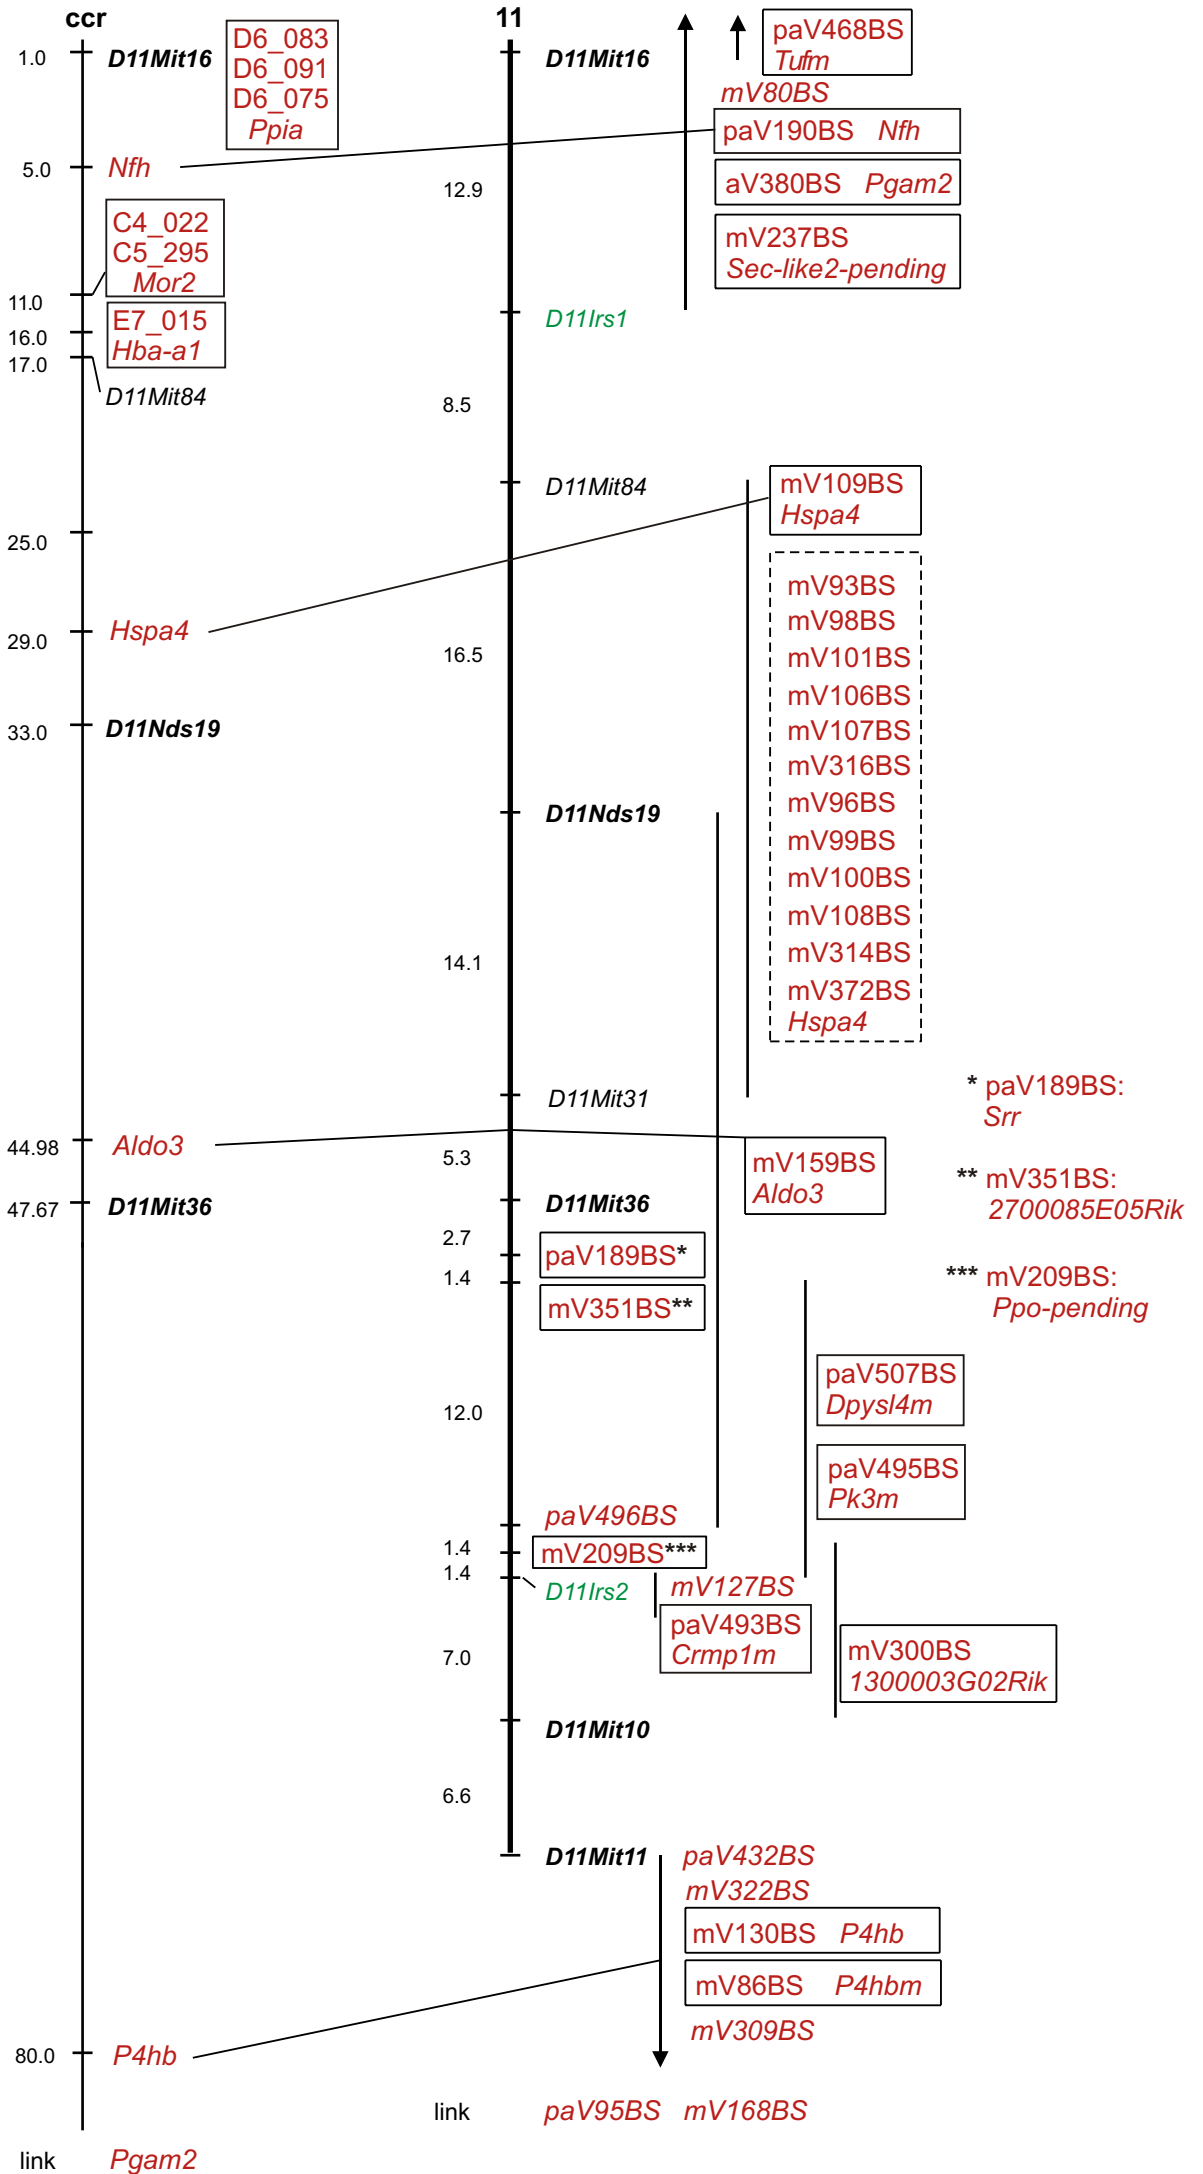

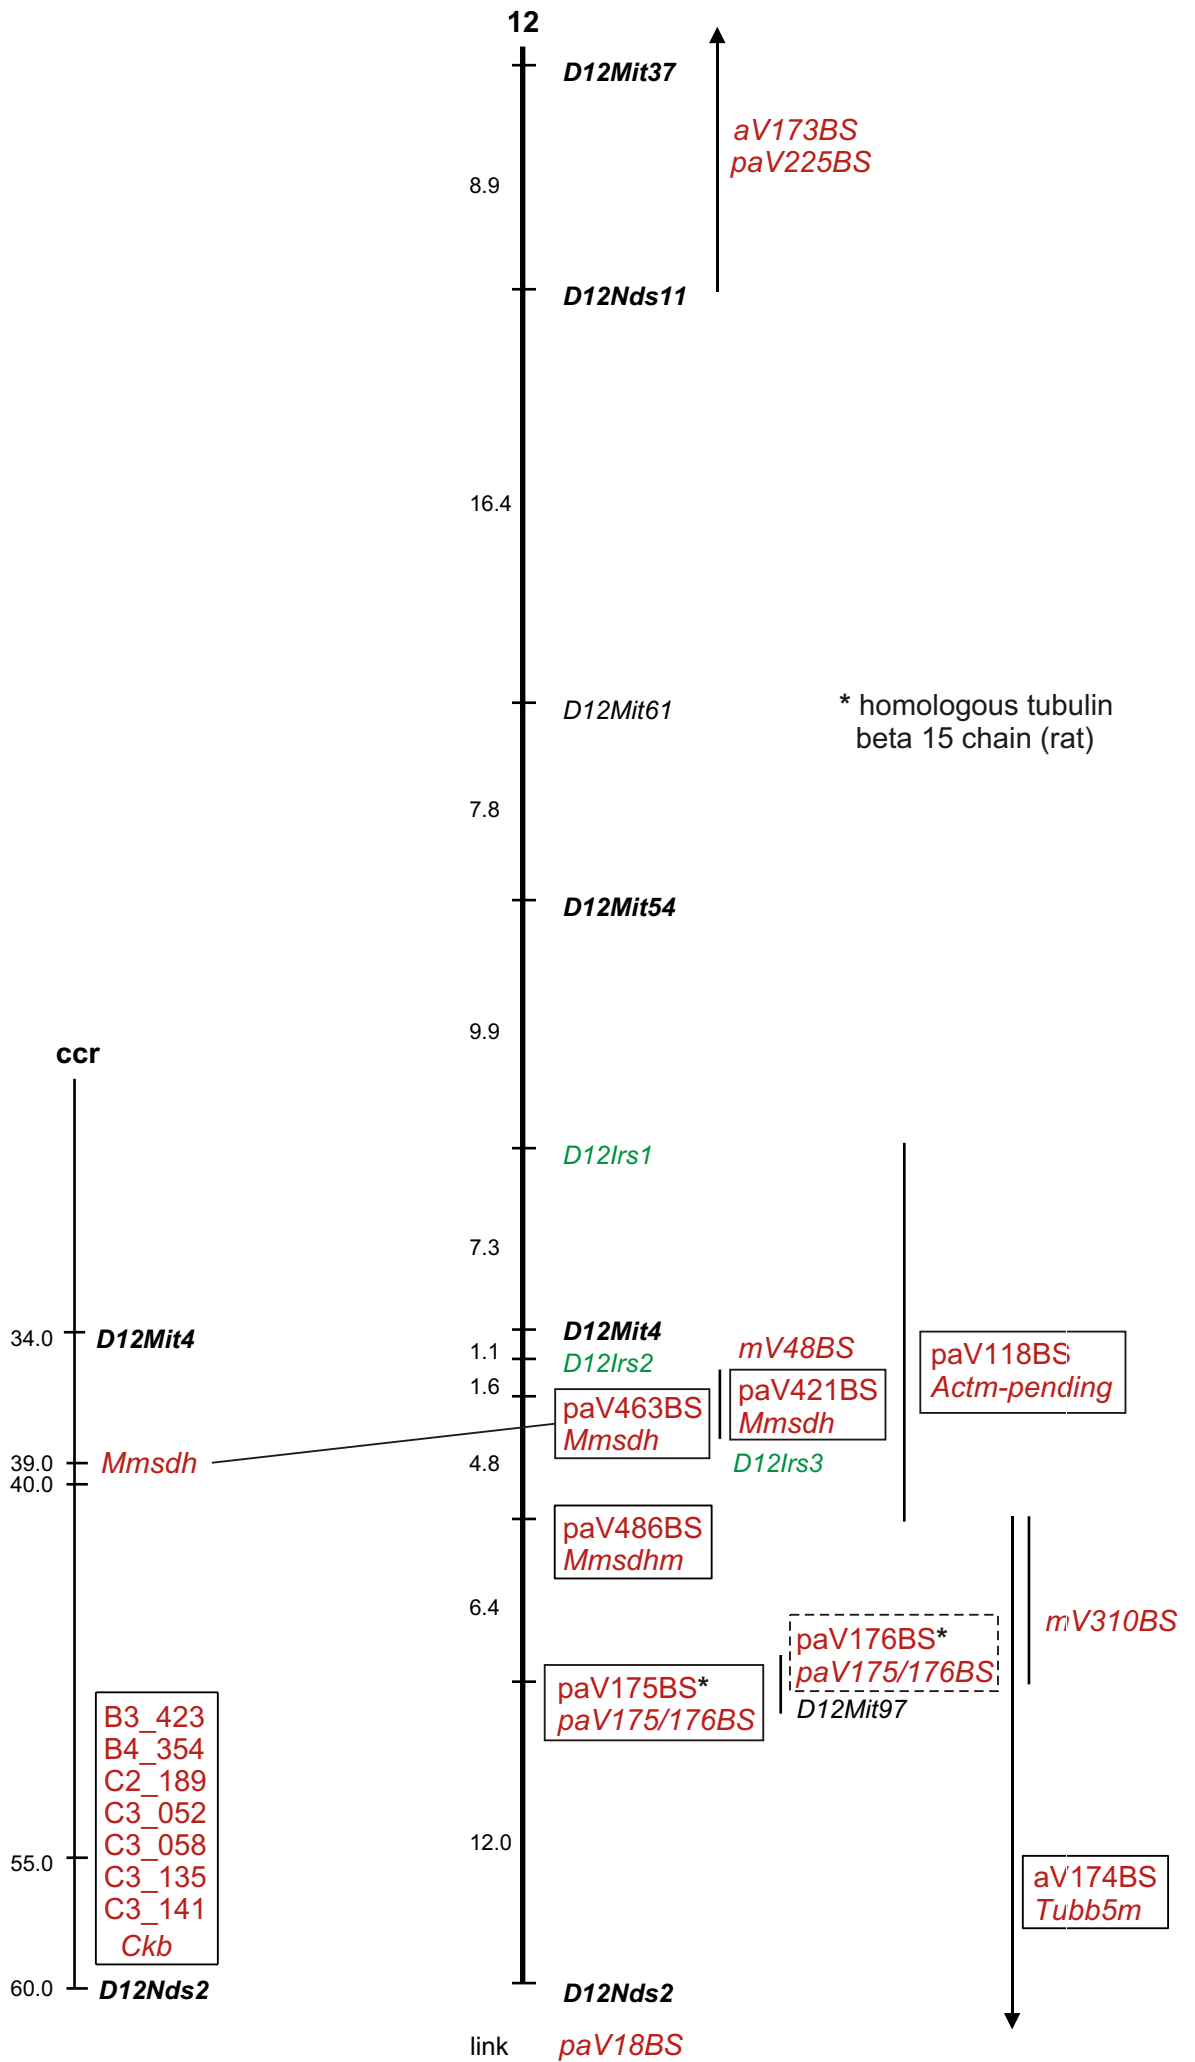

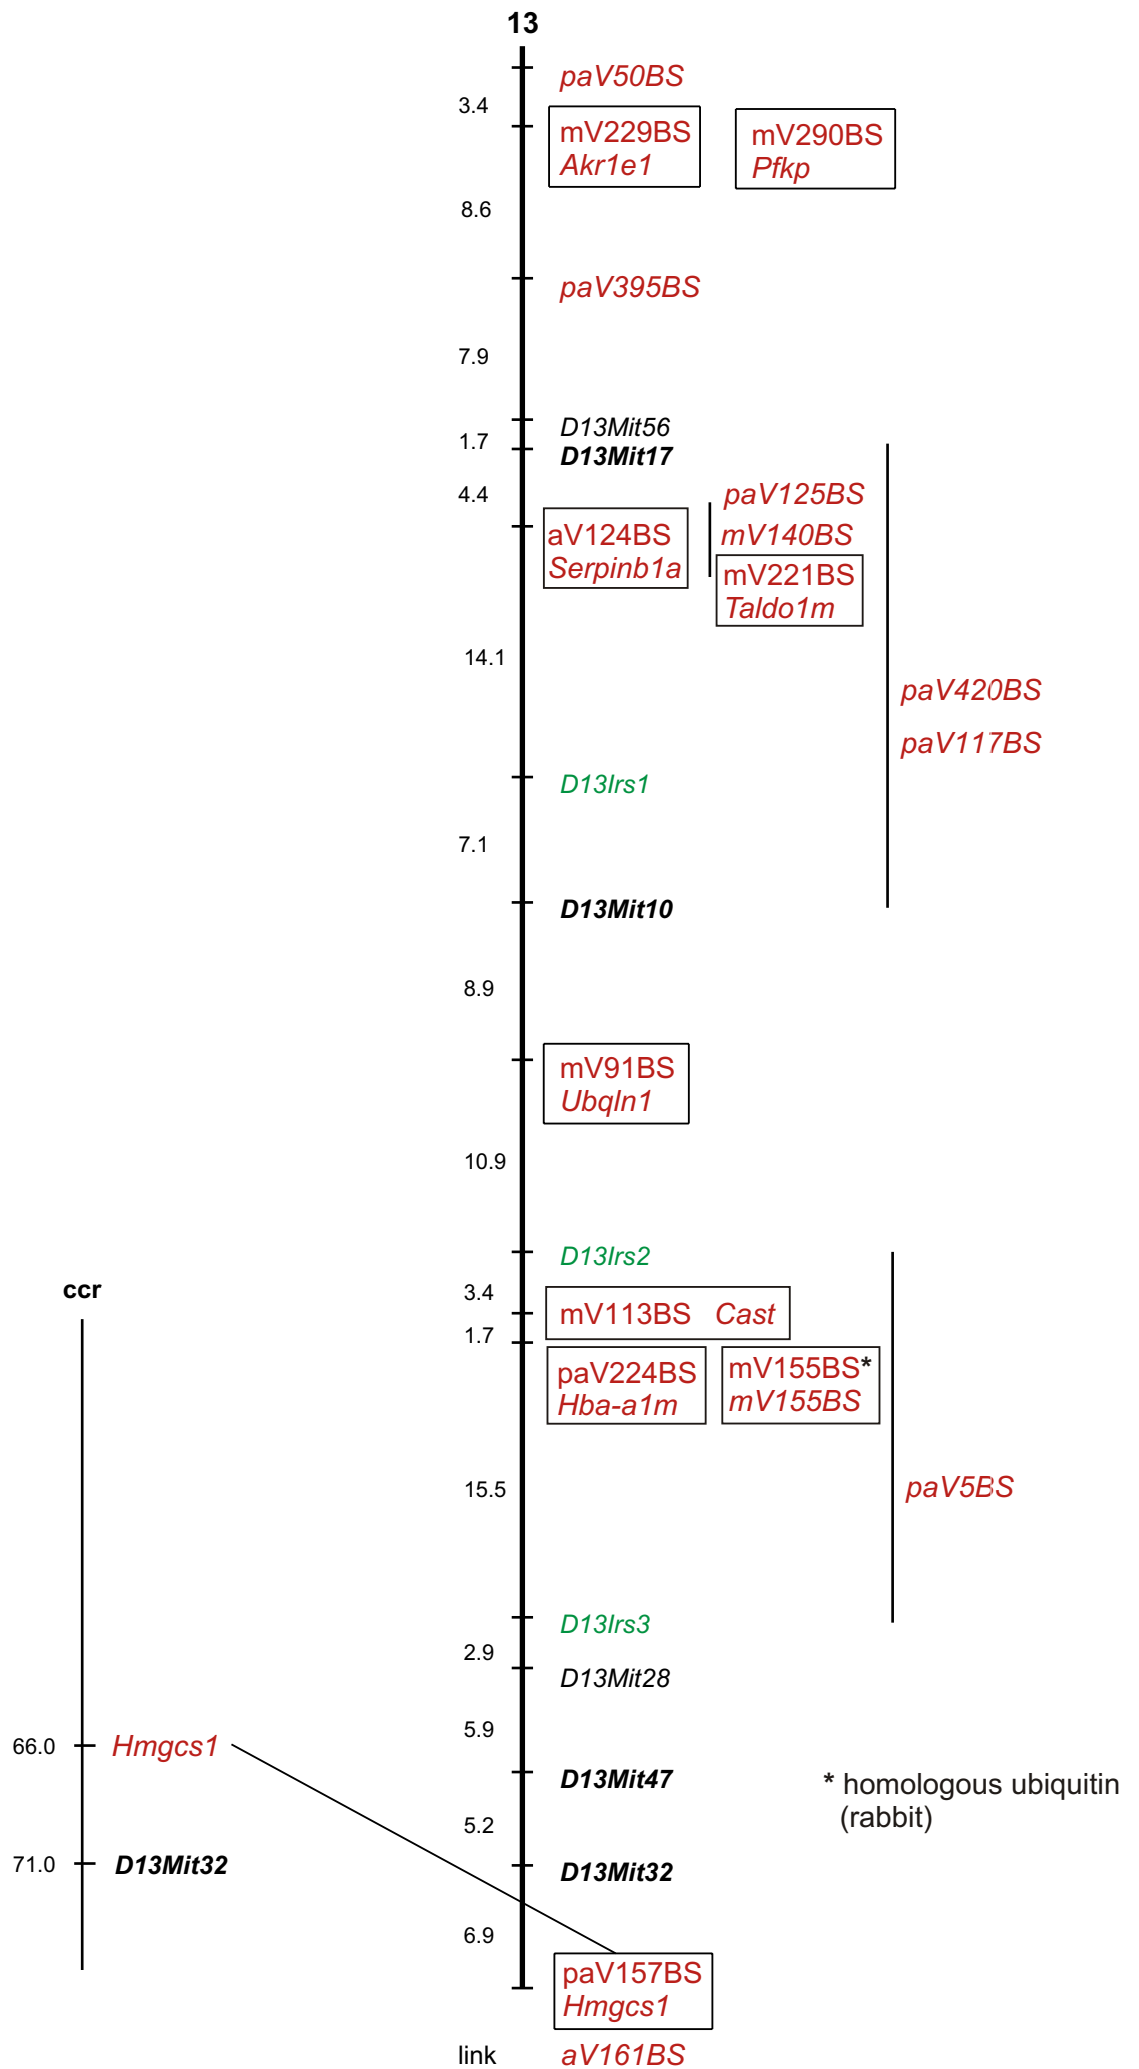

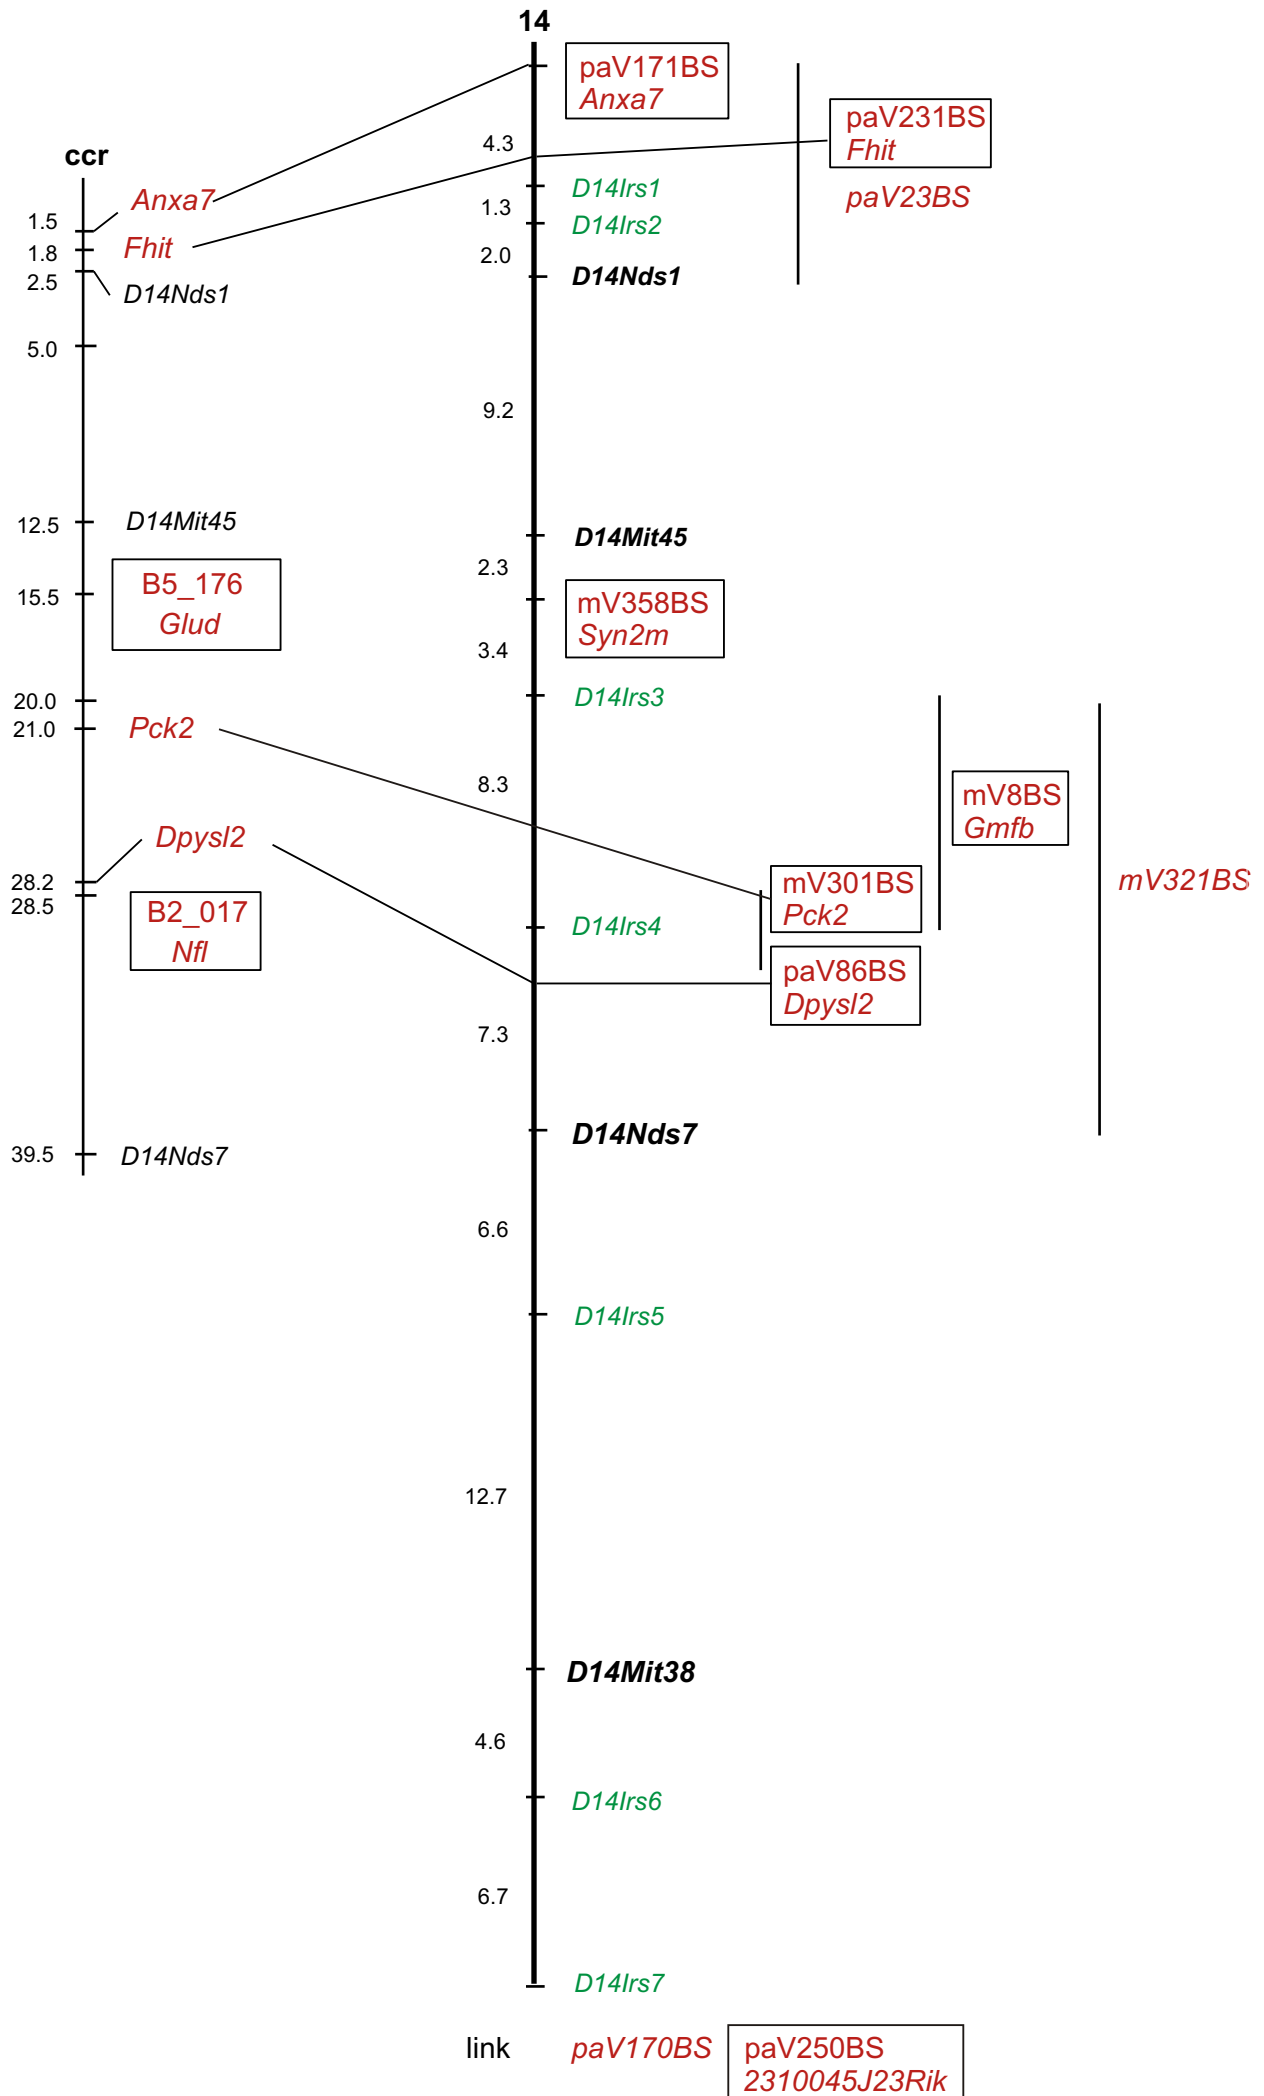

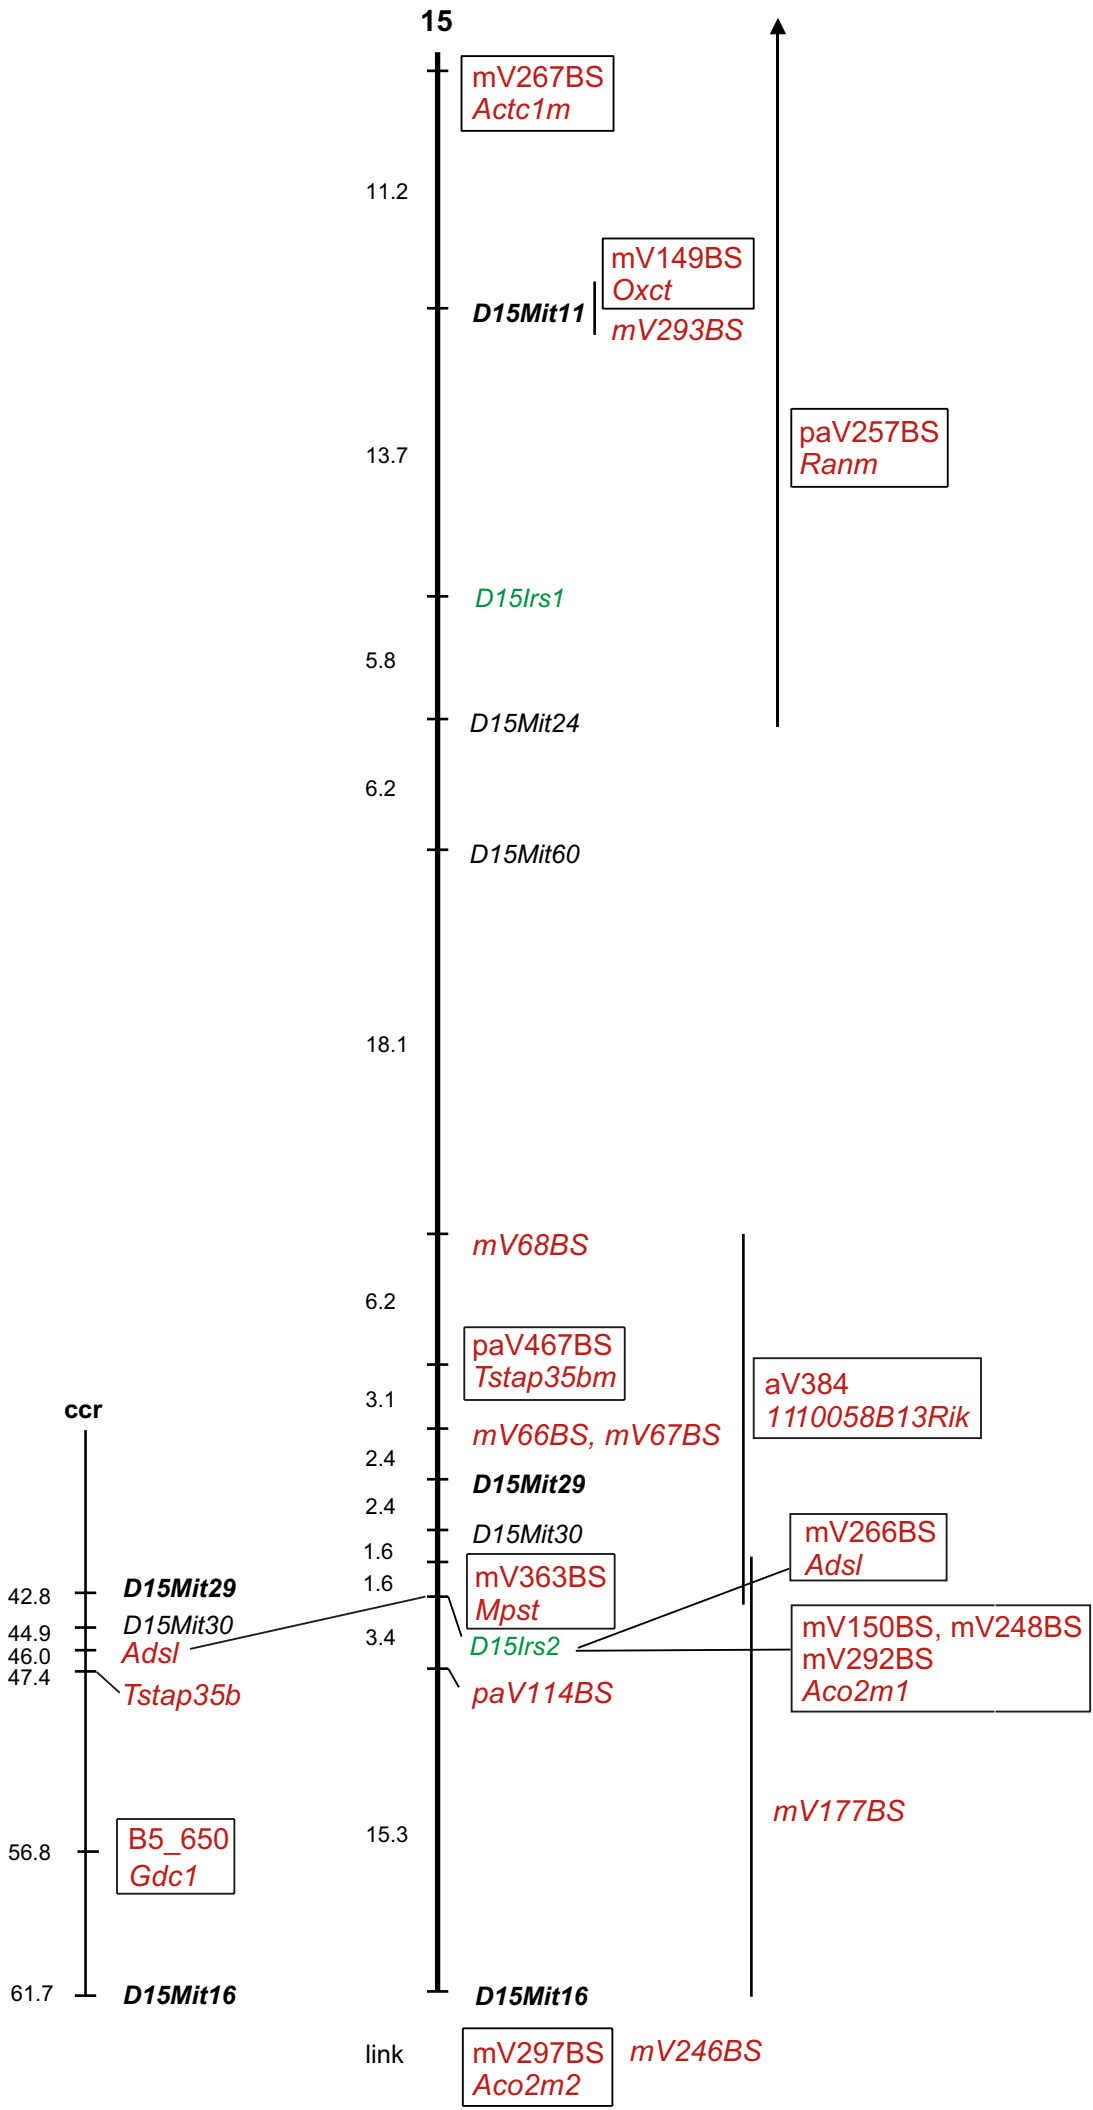

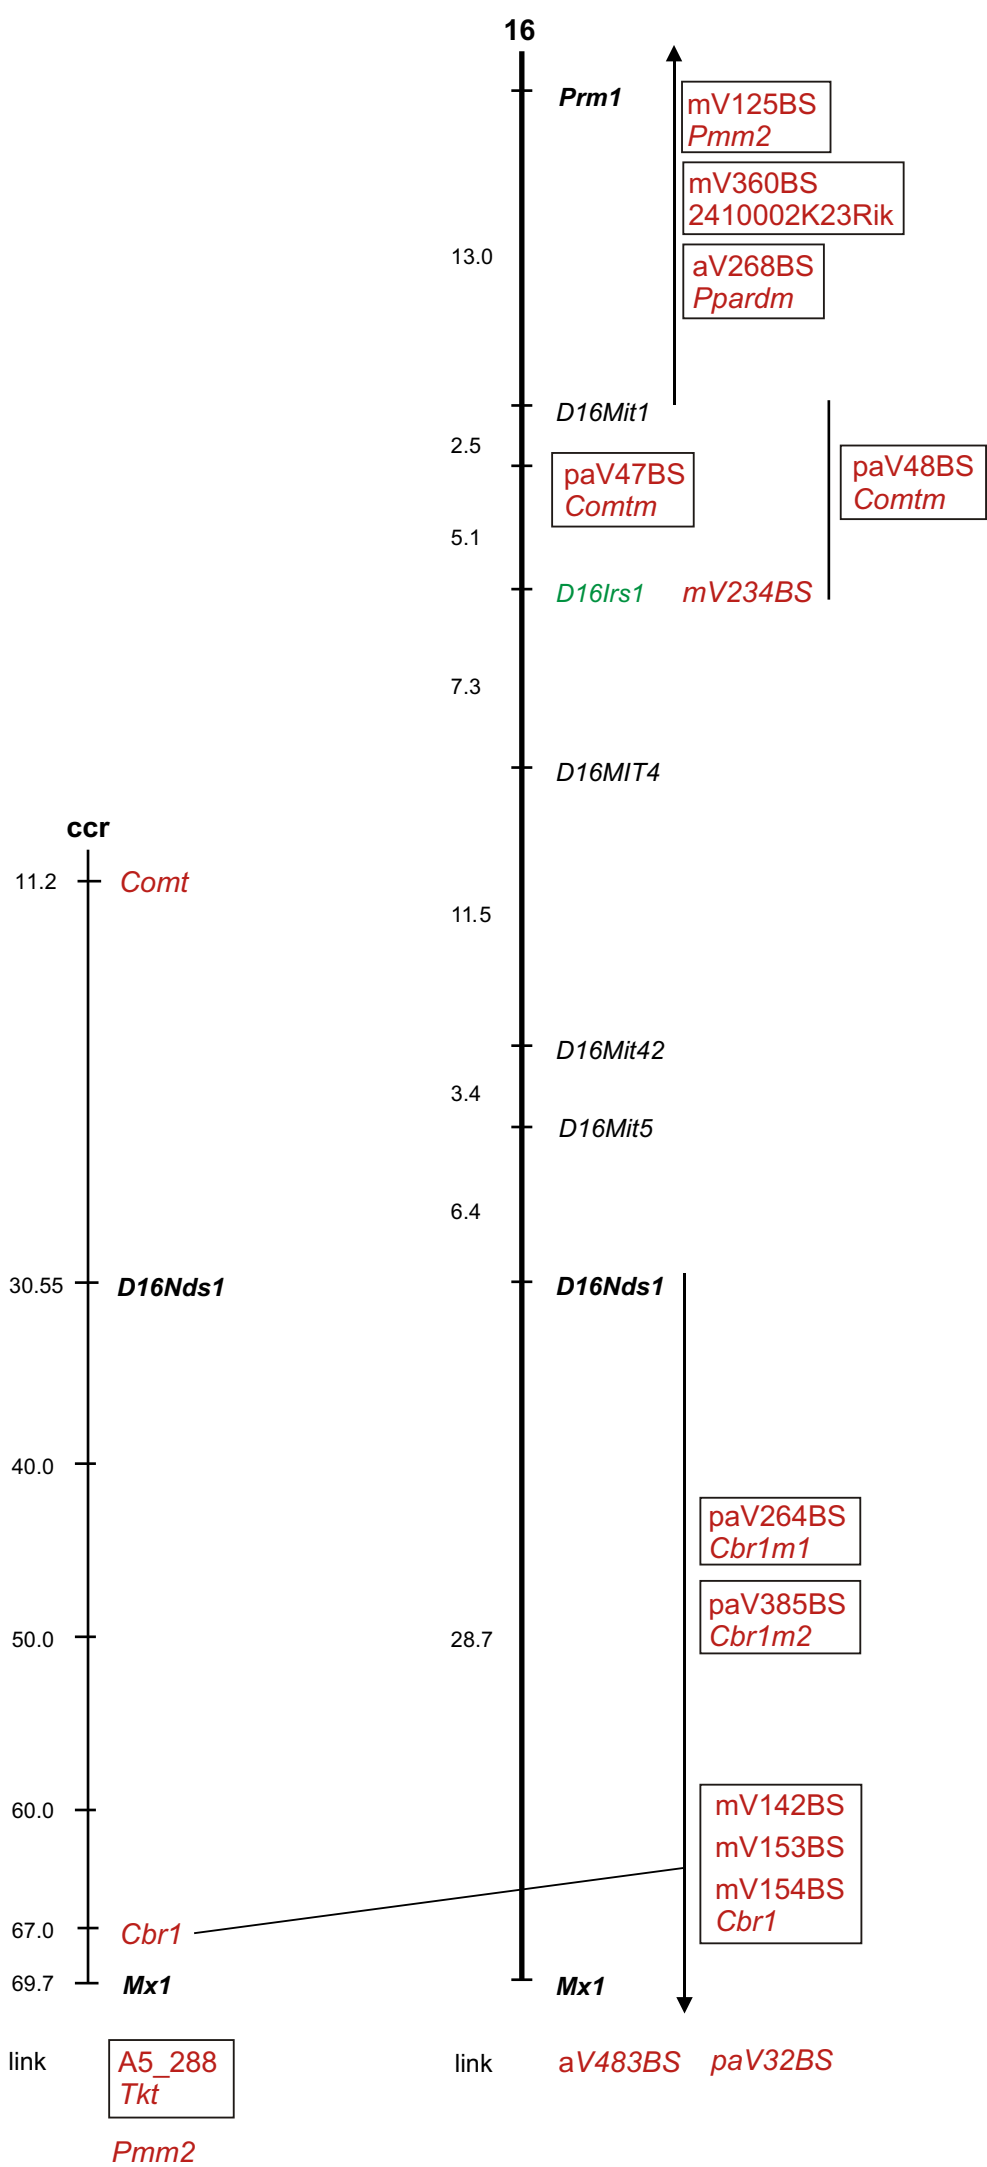

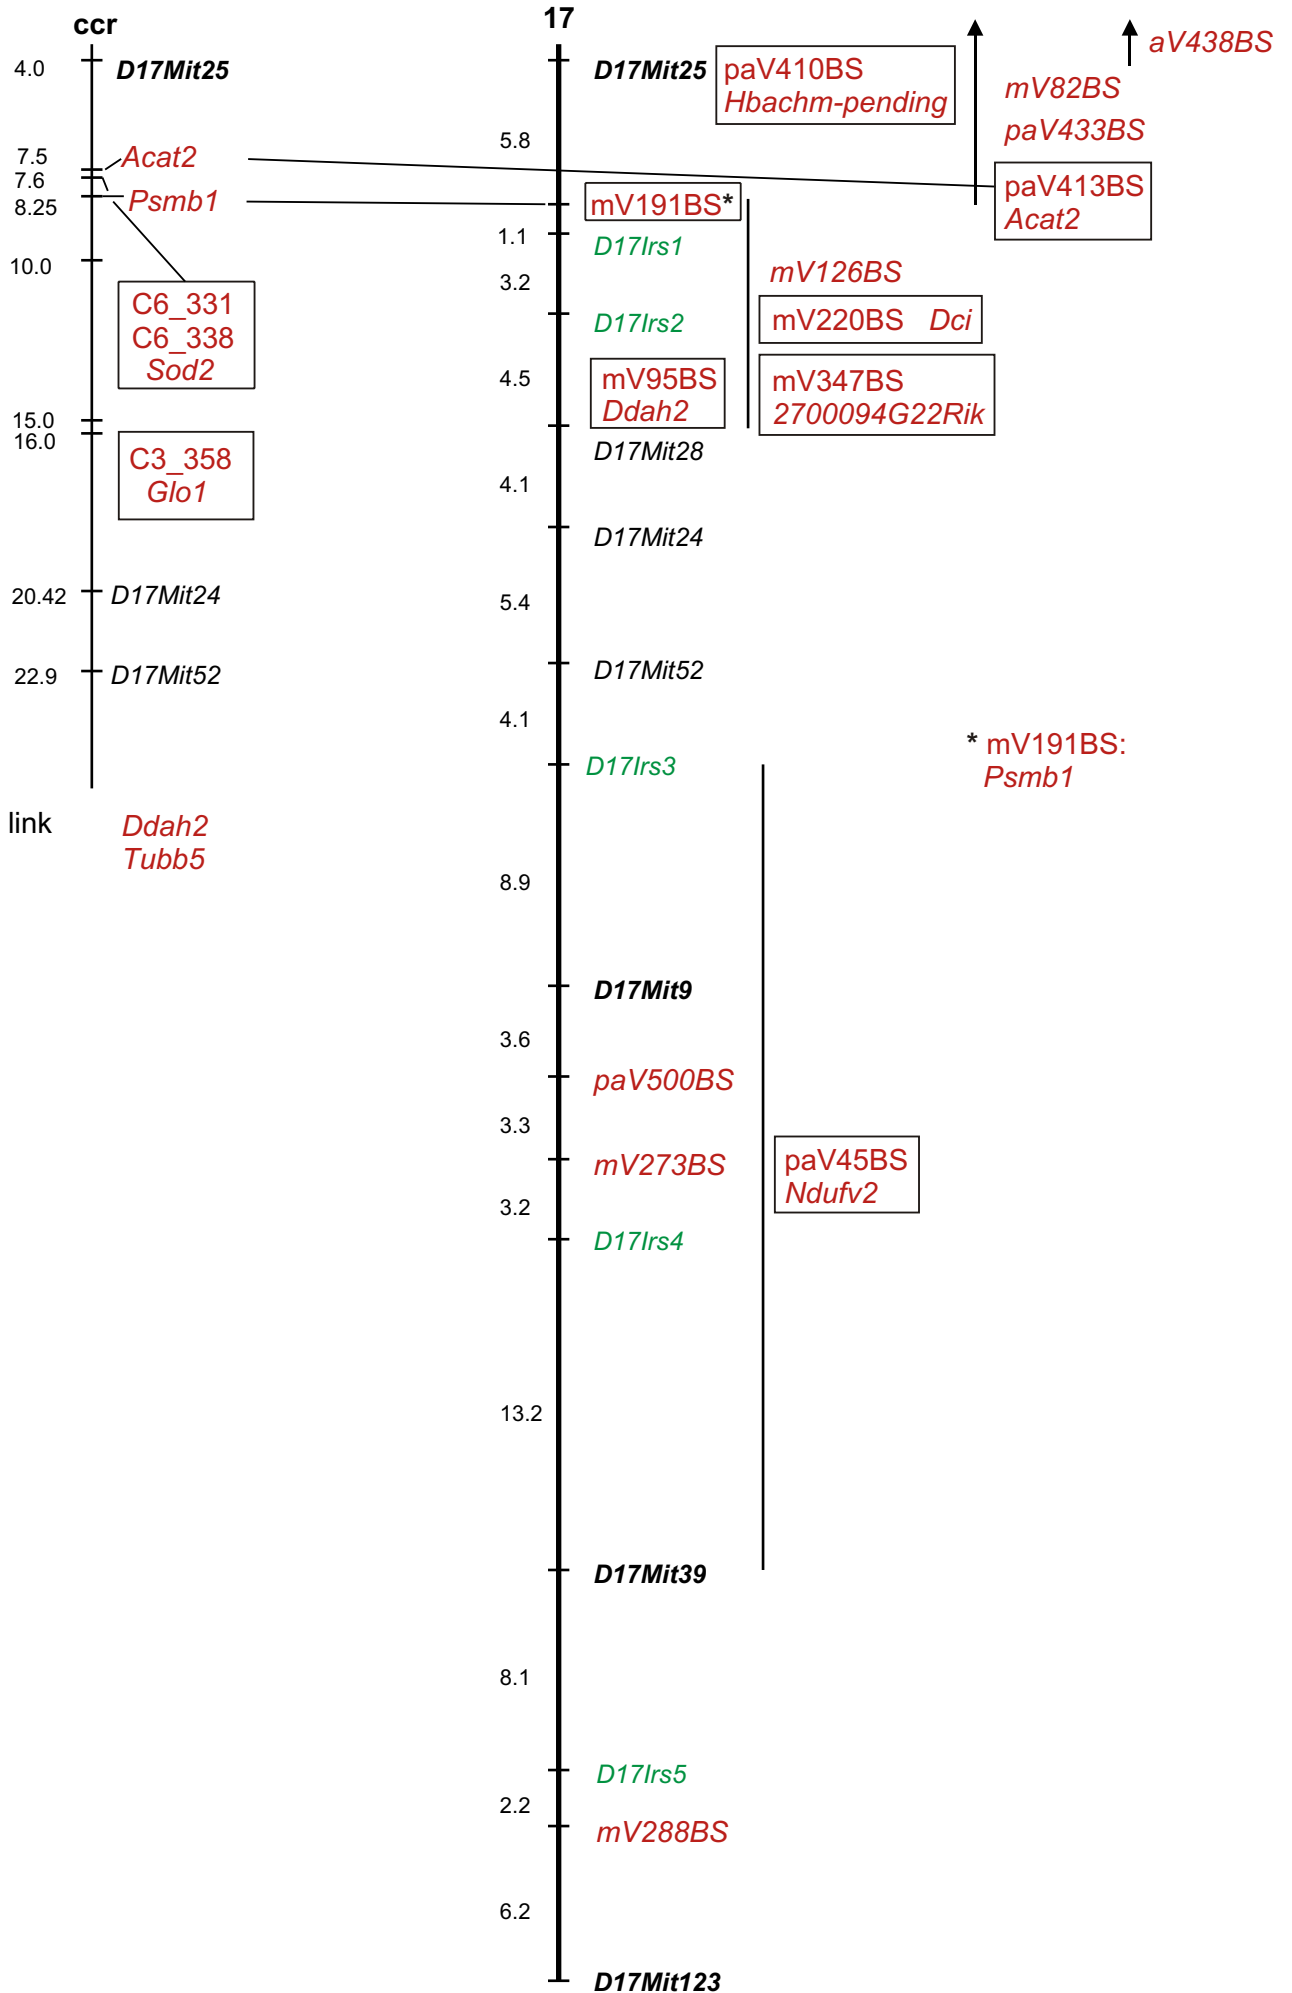

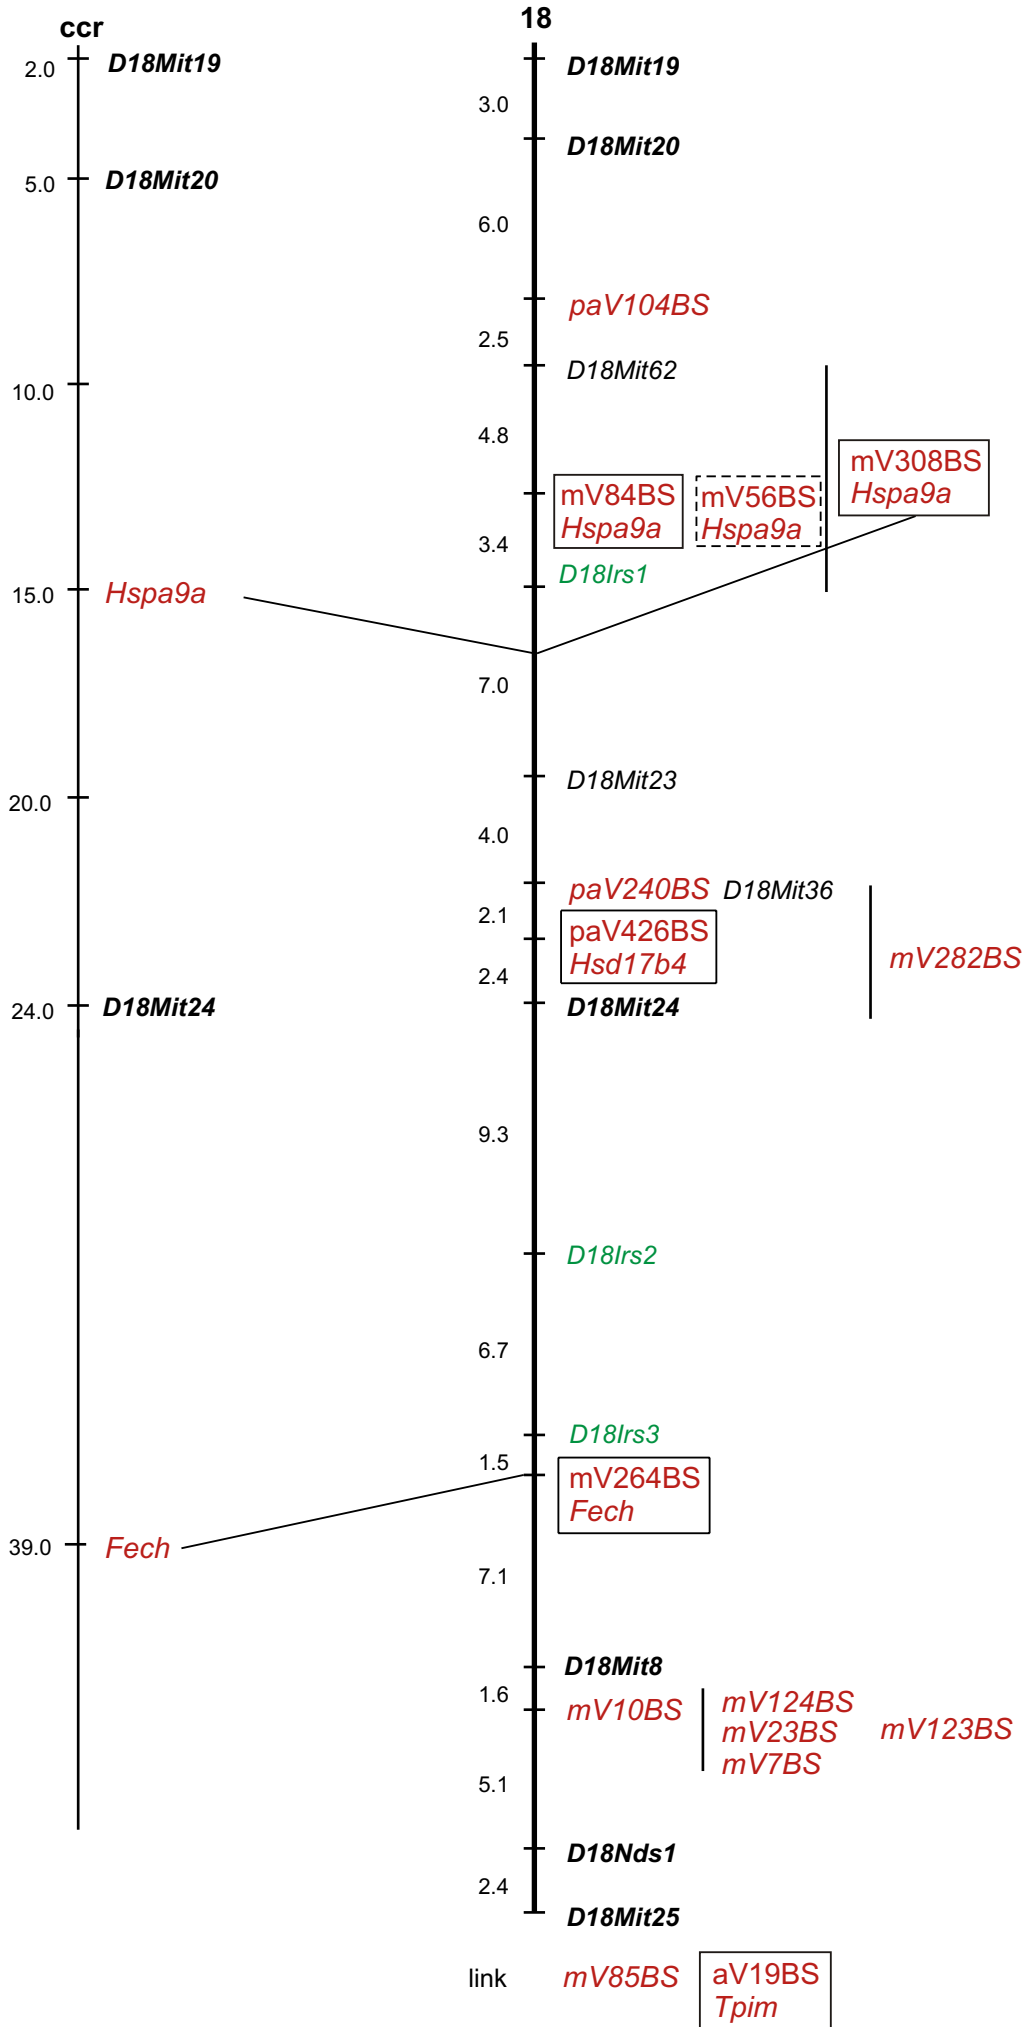

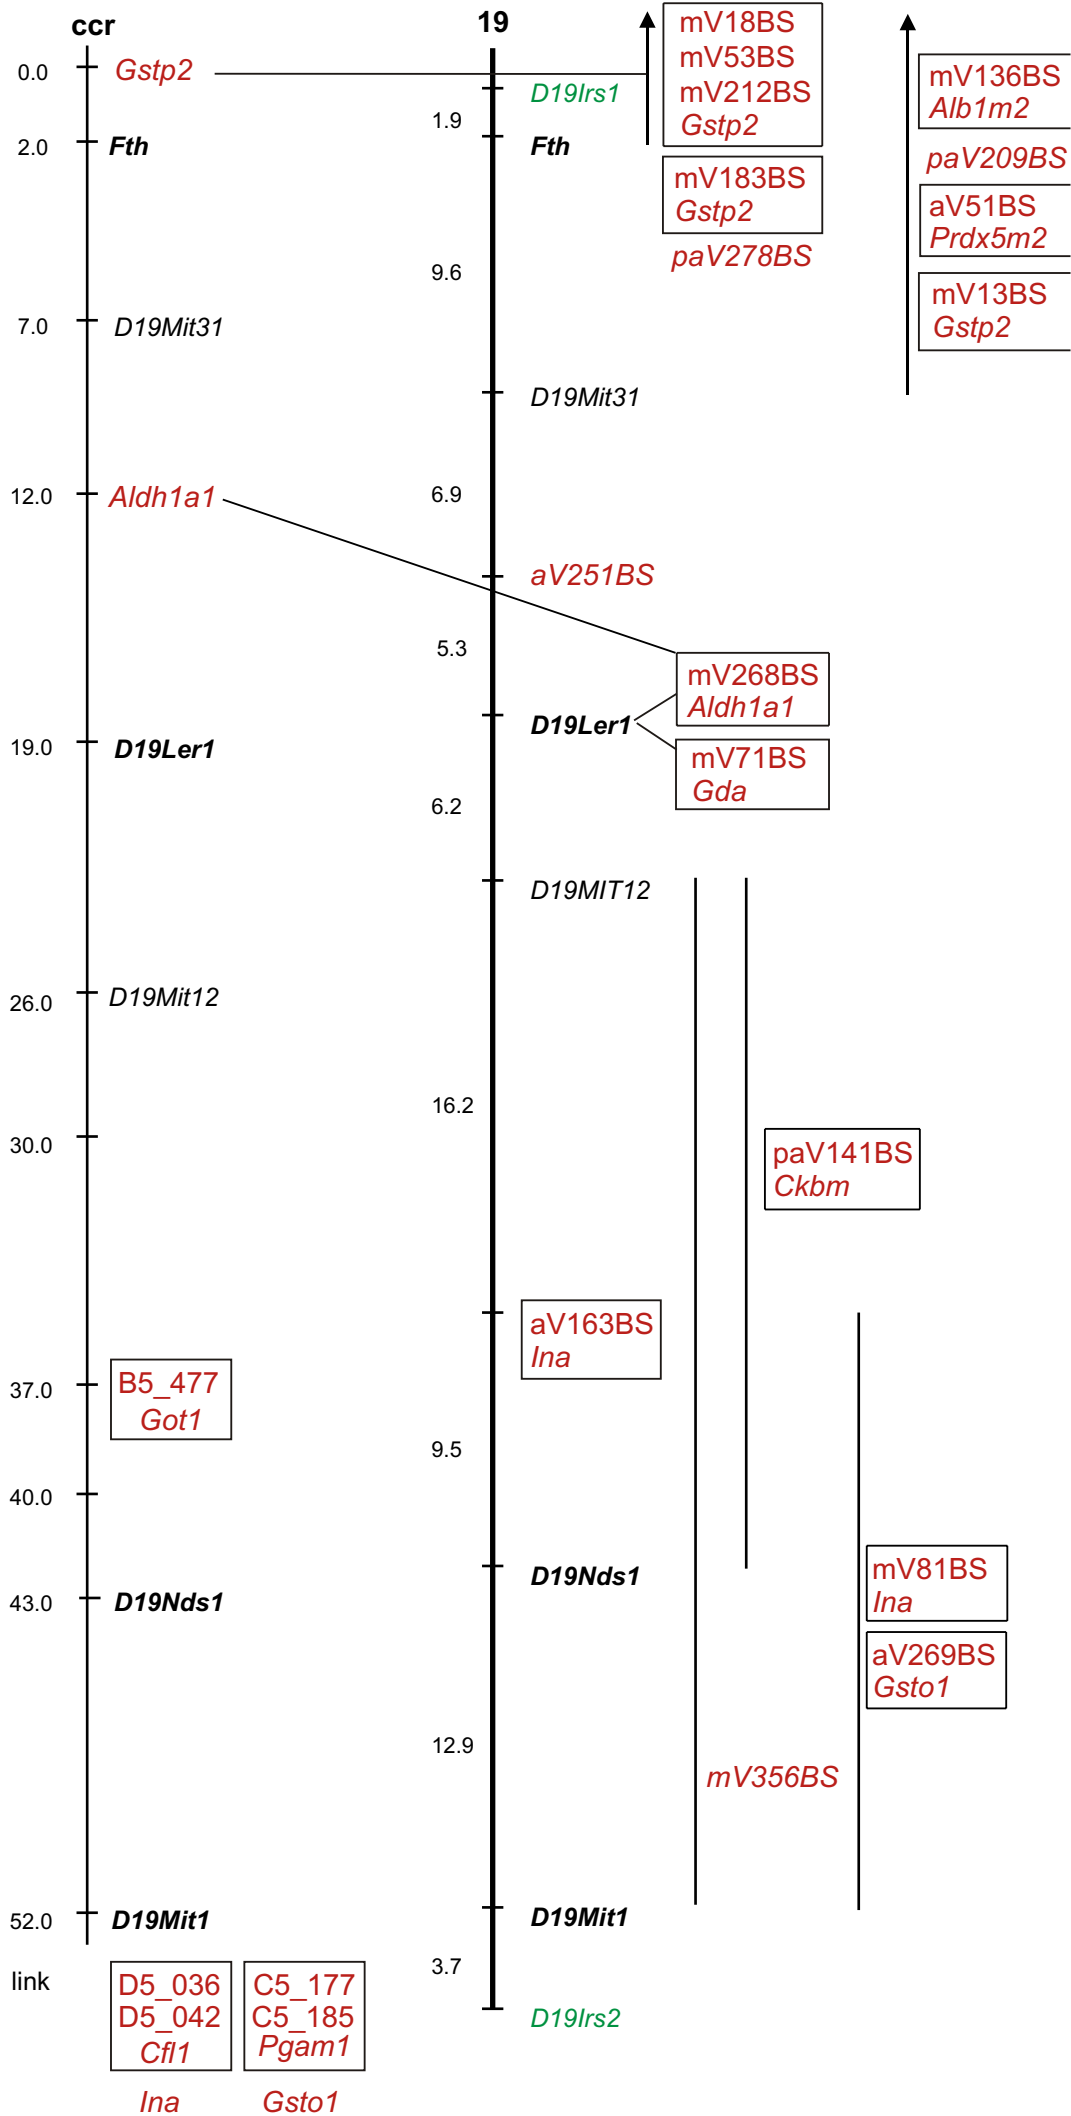

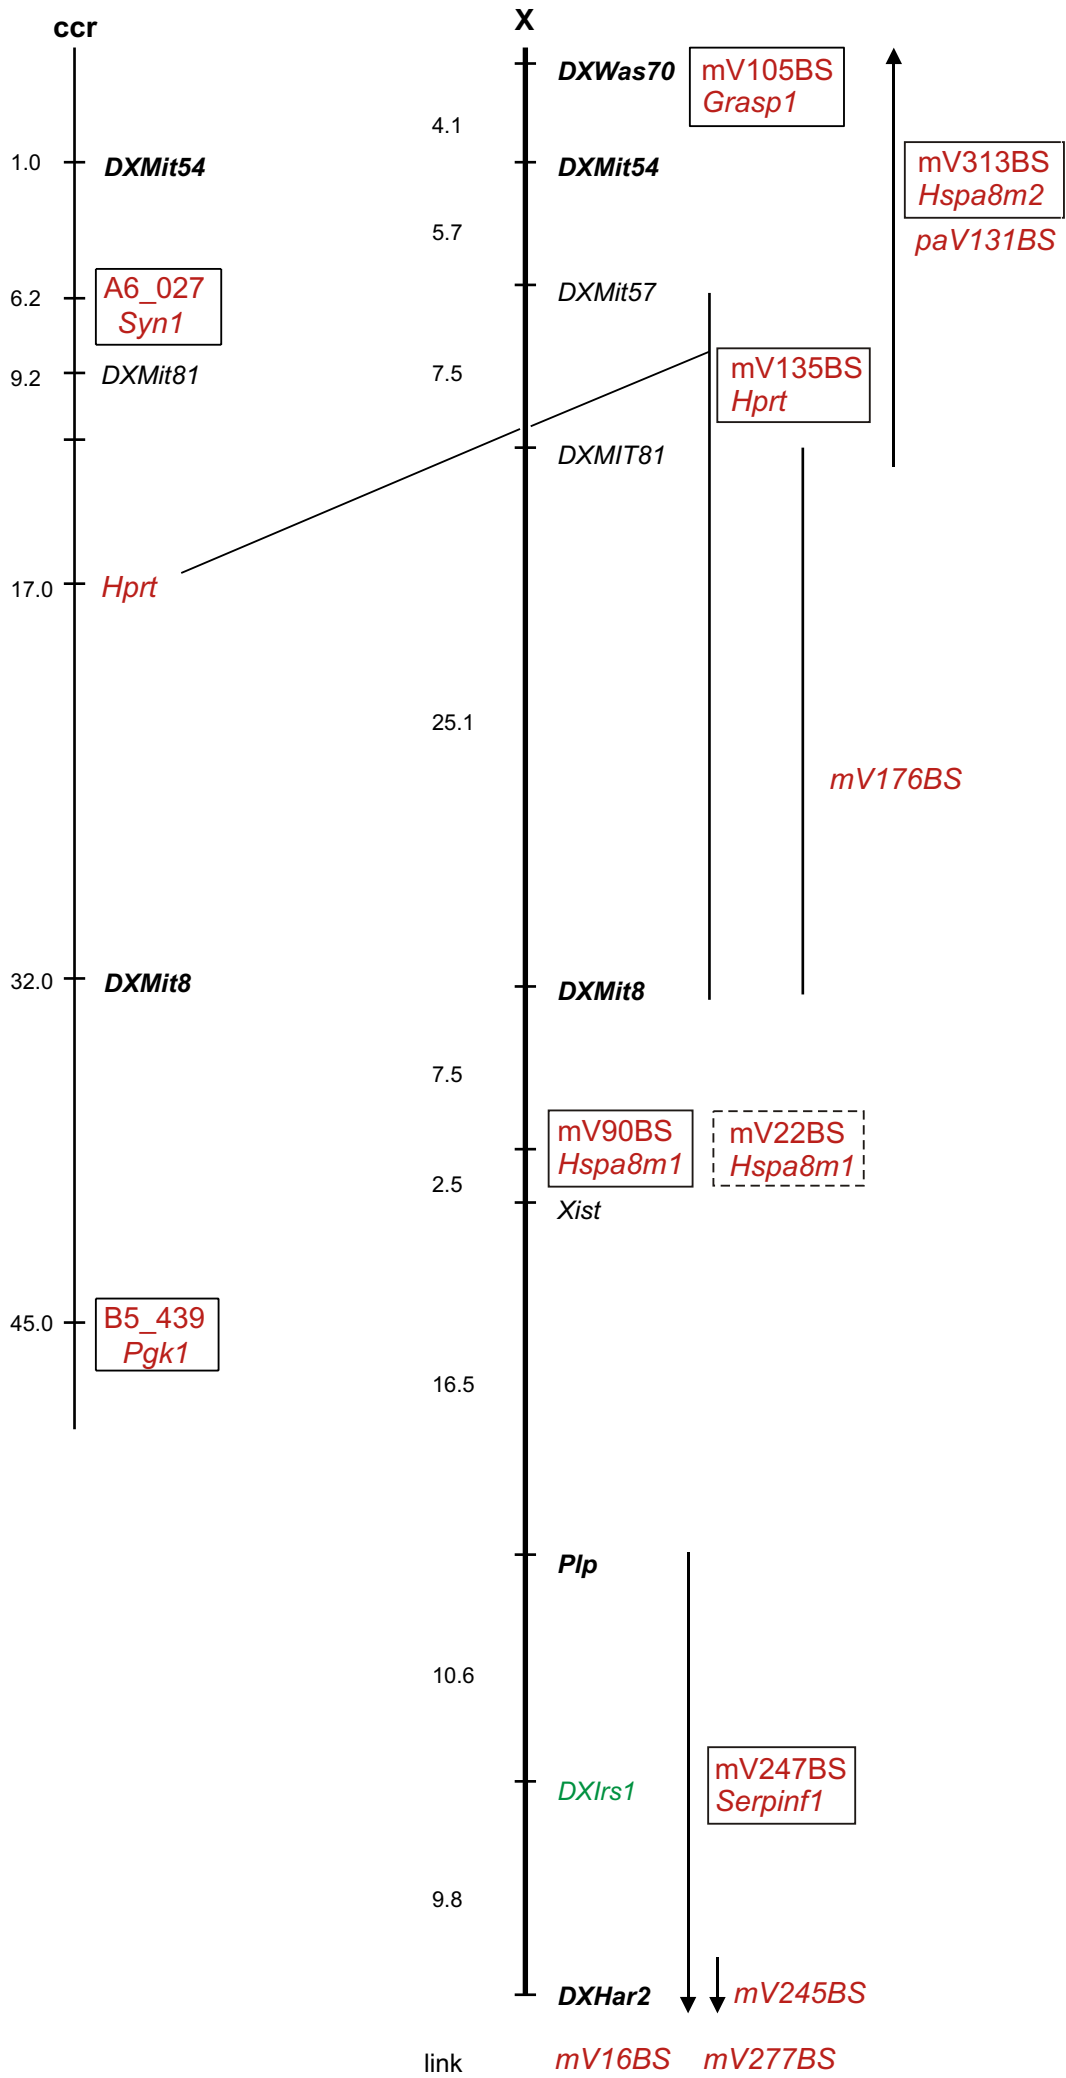

Supplement: ng861-S1.pdf [file ng861-S1.pdf]
